# Supplementary material for: The climate change distress and impairment scale: Introduction of the measure and first findings on pro-environmental behavior
Source: Research Square preprint supplement (doi:10.21203/rs.3.rs-1986606/v1), 2022-08-26
Supplement: Supplementary file 1 [file 01d7e397d689fb6cb924c631.xlsx]

## Sheet: Overview
	initial item set study 1	var names sosci 1	var name R study 1	item retained from study 1 to study 2	items study 2	var name sosci 2	var name R study 2	names new vars of study 2	items in study 1 and 2	items retained from study 2 to study 3	var name sosci 3	26 item solution	23 item solution
Unsustainable behavior bothers me.	1	CA01_02	ang1	1	1	CA01_14	ang8		1			0
I am not mad when others damage the climate.	1	CA01_20	ang10_r	1	1	CA01_16	ang14r		1	1	SC01_04	1
I do not judge others for their environmental behavior.	1	CA01_19	ang11_r	1	1	CA01_08	ang12r		1			0
I do not care about others wasting energy.	1	CA02_35	ang12_r	1	1	CA02_05	ang11r		1			0
It is okay that some people are not interested in climate change.	1	CA03_46	ang13_r	1	1	CA01_03	ang15r		1			0
I feel good about the steps that have already been taken to address climate change.	1	CA04_65	ang14_r	0	0	na	na		0			0
I do not get upset when others ignore climate change.	1	CA04_71	ang15_r	1	1	CA03_05	ang9r		1	1	SC01_10	1
I am calm because I think that enough is being done about climate change.	1	CA04_83	ang16_r	1	1	CA03_08	ang3r		1			0
I resent others for not behaving pro-environmentally.	1	CA01_21	ang2	1	1	CA03_18	ang13		1			0
It makes me furious when others deny climate change.	1	CA02_22	ang3	1	1	CA02_17	ang5		1	1	SC01_07	1
I get upset when others behave unsustainably.	1	CA02_24	ang4	1	1	CA01_13	ang2		1			0
I am enraged that we have missed many chances to stop climate change.	1	CA02_36	ang5	1	1	CA02_10	ang6		1			0
I want companies who destroy the climate to be punished.	1	CA02_37	ang6	1	1	CA03_17	ang7		1	1	SC01_13	1
I feel aggressive towards people who destroy the environment.	1	CA02_42	ang7	1	1	CA01_01	ang4		1			0
I feel angry when I see how little is done to combat climate change.	1	CA04_84	ang8	1	1	CA02_11	ang1		1	1	SC01_01	1
I am not angry that some countries have missed their climate protection goals.	1	CA01_08	ang9_r	1	1	CA02_01	ang10r		1	1	SC01_16	1
I feel tense when I think about climate change.	1	CA01_03	anx1	0	0	na	na		0			0
I do not worry about the effects of climate change.	1	CA02_27	anx10_r	1	1	CA01_09	anx10r		1	1	SC01_14	1
I find climate change harmless.	1	CA02_31	anx11_r	0	0	na	na		0			0
Despite climate change, I look positively toward the future.	1	CA03_43	anx12_r	0	0	na	na		0			0
I am not worried about climate change.	1	CA03_50	anx13_r	1	1	CA01_12	anx11r		1			0
Climate change does not scare me.	1	CA03_54	anx14_r	1	1	CA03_11	anx9r		1	1	SC01_02	1
I believe that we will get climate change under control.	1	CA03_58	anx15_r	0	0	na	na		0			0
I feel carefree when I think about climate change.	1	CA04_69	anx16_r	1	1	CA03_04	anx12r		1	1	SC01_08	1
	1	CA01_04	anx2	1	1	CA03_13	anx2		1	1	SC01_05	1
I fear that we cannot stop climate change.	1	CA02_40	anx3	1	1	CA02_03	anx3		1			0
I fear that some resources will become scarce because of climate change.	1	CA02_41	anx4	1	1	CA03_03	anx1		1	1	SC01_17	1
I fear that political conflicts will increase due to climate change.	1	CA03_53	anx5	1	1	CA03_10	anx4		1			0
I fear that more animal species will go extinct.	1	CA03_63	anx6	1	1	CA02_15	anx6		1			0
The uncertainty about how climate change will progress scares me.	1	CA04_72	anx7	1	1	CA03_12	anx5		1	1	SC01_11	1
I am scared that people will lose their homes because of climate change.	1	CA04_73	anx8	1	1	CA01_10	anx7		1			0
I do not fear for my future on this planet.	1	CA01_09	anx9_r	1	1	CA01_11	anx8r		1			0
I am ashamed that I do not behave more sustainably.	1	CA01_06	guilt1	0	0	na	na		0			0
I do enough to counteract climate change.	1	CA01_12	guilt10_r	0	0	na	na		0			0
I am proud of my environmentally conscious behavior.	1	CA01_07	guilt11_r	0	0	na	na		0			0
I am not responsible for stopping climate change.	1	CA02_34	guilt12_r	0	0	na	na		0			0
I am happy with my contribution to climate protection.	1	CA03_47	guilt13_r	0	0	na	na		0			0
I am comfortable not making sacrifices for climate protection.	1	CA03_57	guilt14_r	0	0	na	na		0			0
My commitment to climate protection is sufficient.	1	CA03_60	guilt15_r	0	0	na	na		0			0
Climate change is not my problem.	1	CA03_64	guilt16_r	0	0	na	na		0			0
Humanity is destroying the planet with its self-interest.	1	CA01_05	guilt2	0	0	na	na		0			0
I feel that I am not doing enough to stop climate change.	1	CA02_33	guilt3	0	0	na	na		0			0
Sometimes I think about how my actions have harmed the climate.	1	CA02_28	guilt4	0	0	na	na		0			0
I think climate change is my fault too.	1	CA03_44	guilt5	1	1	CA02_16	gui3		1			0
I feel bad when I waste energy.	1	CA03_45	guilt6	1	1	CA03_01	gui2		1			0
When I see news about climate change, I feel complicit.	1	CA04_67	guilt7	1	1	CA01_15	gui1		1			0
I am embarrassed that I used to take climage change less seriously than I do now.	1	CA04_77	guilt8	0	0	na	na		0			0
Others are to blame for climate change.	1	CA01_11	guilt9_r	0	0	na	na		0			0
Climate change drains all my energy.	1	CA01_18	impg1	1	1	IM01_09	impg1		1	1	SC01_19	1
My thoughts and feelings about climate change do not affect how well I sleep.	1	CA04_76	impg10_r	1	1	IM01_12	impg4r		1	1	SC01_23	1
When I think about climate change, I get a headache or stomachache.	1	CA02_23	impg2	1	1	IM01_10	impg2		1	1	SC01_21	1
Because of climate change, I am overwhelmend by everyday activities.	1	CA02_26	impg3	1	1	IM01_11	impg3		1	1	SC01_24	1
When I think about climate change I do not feel like doing anything.	1	CA02_29	impg4	0	0	na	na		0			0
I have given up hobbies because they are bad for the climate.	1	CA04_80	impg5	0	0	na	na		0			0
Climate change does not keep me from enjoying my life.	1	CA01_15	impg6_r	1	1	IM01_15	impg7r		1			0
My thoughts and feelings about climate change do not negatively impact my everyday life.	1	CA01_17	impg7_r	1	1	IM01_13	impg5r		1	1	SC01_20	1
I have no trouble mentally tuning out climate change.	1	CA03_49	impg8_r	1	1	IM01_14	impg6r		1	1	SC01_25	1
I can easily balance my commitment to climate protection with my everyday life.	1	CA04_66	impg9_r	0	0	na	na		0			0
I fight with family and friends because they see climate change differently than I do.	1	CA01_14	imps1	1	1	IM01_01	imps1		1			0
I have lost friends because we had different opinions on climate change	1	CA04_74	imps2	0	0	na	na		0			0
Constant discussions about climate change are affecting my relationships.	1	CA04_82	imps3	1	1	IM01_02	imps2		1	1	SC01_22	1
I have never broken ties with anyone because of a differing opinion on climate change.	1	CA01_13	imps4_r	1	1	IM01_03	imps3r		1			0
I do not feel excluded by others because of my views on climate change.	1	CA02_32	imps5_r	1	1	IM01_04	imps4r		1			0
It is easy for me to find friends who see climate change the way I do.	1	CA03_52	imps6_r	0	0	na	na		0			0
I frequently think about climate change instead of working/studying.	1	CA01_16	impw1	1	1	IM01_06	impw2		1			0
When I think about climate change, I cannot bring myself to work/study.	1	CA03_59	impw2	1	1	IM01_05	impw1		1	1	SC01_26	1
Even when I think about climate change, I can easily concentrate at work/in school.	1	CA03_61	impw3_r	1	1	IM01_07	impw3r		1			0
On days on which I worry about climate change, I am as productive as usual.	1	CA04_70	impw4_r	1	1	IM01_08	impw4r		1			0
I do not feel guilty about putting my own needs before climate protection.	0	na	na	na	1	CA03_06	gui11r	guilt23_r	0			0
I do not feel guilty about having hobbies that harm the climate.	0	na	na	na	1	CA02_14	gui10r	guilt21_r	0			0
I do not feel guilty when I use a lot of water.	0	na	na	na	1	CA02_06	gui12r	guilt26_r	0			0
I am not to blame for the state of the environment.	0	na	na	na	1	CA03_15	gui13r	guilt18_r	0			0
I am not to blame for the consequences of climate change.	0	na	na	na	1	CA01_04	gui14r	guilt17_r	0			0
I feel guilty because I do not do enough to educate myself about climate change.	0	na	na	na	1	CA02_18	gui4	guilt22	0			0
I feel guilty because I produce more greenhouse gases than I need to.	0	na	na	na	1	CA02_09	gui5	guilt27	0			0
I feel guilty because I could do more to save natural resources.	0	na	na	na	1	CA03_16	gui6	guilt19	0			0
I feel guilty because the lifestyle I want is not sustainable.	0	na	na	na	1	CA02_02	gui7	guilt24	0			0
I do not feel guilty about producing waste	0	na	na	na	1	CA02_04	gui8r	guilt25_r	0			0
I do not feel guilty about using up a lot of resources.	0	na	na	na	1	CA02_13	gui9r	guilt20_r	0			0
News about climate change makes me feel depressed.	1	CA01_01	sad1	1	1	CA02_12	sad1		1	1	SC01_03	1
The exctinction of animal species does not make me feel sad.	1	CA01_10	sad10_r	0	0	na	na		0			0
I am not concerned about climate change.	1	CA02_30	sad11_r	0	0	na	na		0			0
I find forecasts about climate change amusing.	1	CA03_55	sad12_r	0	0	na	na		0			0
I feel happy when I think about the current state of the environment.	1	CA03_62	sad13_r	1	1	CA03_02	sad9r		1	1	SC01_12	1
I am happy about the changes that climate change brings about.	1	CA04_78	sad14_r	1	1	CA01_07	sad11r		1			0
I am not troubled by news about the consequences of climate change.	1	CA04_79	sad15_r	0	0	na	na		0			0
I am not sad about climate change.	1	CA04_81	sad16_r	1	1	CA03_14	sad10r		1	1	SC01_06	1
Thinking about climate change makes me want to cry.	1	CA02_25	sad2	1	1	CA01_05	sad2		1			0
I feel sad when someone mentions climate change.	1	CA02_38	sad3	1	1	CA01_02	sad3		1			0
Climate change makes me feel hopeless.	1	CA02_39	sad4	1	1	CA03_07	sad4		1			0
I feel sad that climate change is causing people and animals to suffer.	1	CA03_51	sad5	1	1	CA02_07	sad5		1	1	SC01_18	1
I feel sad that some parts of the environment will not recover from the effects of climate change.	1	CA03_56	sad6	1	1	CA01_06	sad6		1	1	SC01_09	1
The impact that climate change has had on the planet saddens me.	1	CA04_68	sad7	1	1	CA03_09	sad7		1	1	SC01_15	1
I feel miserable when I think about climate change.	1	CA04_75	sad8	1	1	CA02_08	sad8		1			0
I do not care about species going extinct.	1	CA03_48	sad9	0	0	na	na		0			0

## Sheet: Study 1 -> Study 2
Item selection / expansion from Study 1 to Study 2
1. Step: Inspect the inter-item correlations of each item within its designated scale (assuming subscales for anger, sadness, anxiety, guilt, impairment). Discard items with correlations below .20 with other items in their scale. If there are several items with low intercors, first discard the item that has the highest number of low inter-correlations and exclude successively.
2. Step: Exclusion due to content and distribution (items were excluded if their content did no clearly mark them as belonging to one emotion category)
var name R study 1	1. step: exclusion due to inter-item corr	2. step: exclusion due to content & distribution	item retained from study 1 to study 2	items study 2	new vars in study 2
ang1			1	1
ang10_r			1	1
ang11_r			1	1
ang12_r			1	1
ang13_r			1	1
ang14_r	excluded		0	0
ang15_r			1	1
ang16_r			1	1
ang2	should have been excluded but was retained because well distributed + "resent" covers intense anger		1	1
ang3			1	1
ang4			1	1
ang5			1	1
ang6			1	1
ang7	should have been excluded but was retained because well distributed + covers feelings of aggression		1	1
ang8			1	1
ang9_r			1	1
anx1		excluded because item content marks physiologial component shared by several types of negative affect (unspecific for anxiety)	0	0
anx10_r			1	1
anx11_r	excluded		0	0
anx12_r	excluded		0	0
anx13_r			1	1
anx14_r			1	1
anx15_r	excluded		0	0
anx16_r			1	1
anx2			1	1
anx3	should have been excluded but was retained because anx15_r was excluded and we wanted to keep an item that addresses whether climate change can be controlled in the future		1	1
anx4			1	1
anx5	should have been excluded but was retained for breadth of the scale to cover political conflicts as specific example		1	1
anx6			1	1
anx7			1	1
anx8			1	1
anx9_r			1	1
guilt1		excluded because item content refers to shame instead of guilt	0	0
guilt10_r	excluded		0	0
guilt11_r	excluded		0	0
guilt12_r	excluded		0	0
guilt13_r	excluded		0	0
guilt14_r	excluded		0	0
guilt15_r	excluded		0	0
guilt16_r	excluded		0	0
guilt2	excluded		0	0
guilt3		excluded because it does not focus on affective component, does not necessarily have to invoke guilt	0	0
guilt4		excluded because it does not focus on affective component, does not necessarily have to invoke guilt	0	0
guilt5			1	1
guilt6			1	1
guilt7			1	1
guilt8	excluded		0	0
guilt9_r	excluded		0	0
impg1			1	1
impg10_r			1	1
impg2			1	1
impg3			1	1
impg4	excluded		0	0
impg5		excluded because item covers a rare event that is not necessarily impairing (other hobbies that are fulfilling can be found)	0	0
impg6_r			1	1
impg7_r			1	1
impg8_r			1	1
impg9_r	excluded		0	0
imps1	should have been excluded but was retained to cover interpersonal conflict in the private domain		1	1
imps2		excluded because of little variance, item covers a rare event	0	0
imps3			1	1
imps4_r			1	1
imps5_r	should have been excluded but was retained to cover social exclusion		1	1
imps6_r	excluded		0	0
impw1			1	1
impw2			1	1
impw3_r			1	1
impw4_r			1	1
na			na	1	guilt23_r
na			na	1	guilt21_r
na			na	1	guilt26_r
na			na	1	guilt18_r
na			na	1	guilt17_r
na			na	1	guilt22
na			na	1	guilt27
na			na	1	guilt19
na			na	1	guilt24
na			na	1	guilt25_r
na			na	1	guilt20_r
sad1			1	1
sad10_r	excluded		0	0
sad11_r		excluded because "concern" does not clearly denote sadness (could also be anxiety)	0	0
sad12_r	excluded		0	0
sad13_r			1	1
sad14_r	should have been excluded but was retained because covers the opposite of sadness instead of the absence		1	1
sad15_r		excluded because "troubled" does not clearly denote sadness (could also be other emotion)	0	0
sad16_r			1	1
sad2	should have been excluded but was retained because differentiates at the lower end of sadness		1	1
sad3			1	1
sad4			1	1
sad5			1	1
sad6			1	1
sad7			1	1
sad8			1	1
sad9	excluded		0	0

## Sheet: Study 2 -> Study 3
Item selection / expansion from Study 2 to Study 3
1. Step: Inter-correlations: Exclude all items that correlate < .20 with other items (if there are several items, first discard the items that has the lowest inter-correlations and exclude successively).
2. Step: Item distribution
3. Step: Item content
4. Step: EFA
items in study 2	1. step: exclusion due to inter-item corr	2. step: exclusion due to item distribution	3. step: exclusion due to content	4. step EFA	retained for study 3	retained for 23 item solution in study 3	retained for additional items study 3
ang1	excluded					0	1	1
ang10_r						1	0	1
ang11_r	excluded (same amount of inter-correlations as ang6, we decided to exclude ang11_r due to content (might be social desirability))					0	1	1
ang12_r		excluded (litte variance and reflectsmore absence of emotions than specifically anger)				0	1	1
ang13_r						0	1	1
ang15_r						1	0	1
ang16_r	excluded					0	1	1
ang2				exclude because main loading < .50		0	1	1
ang3						0	1	1
ang4				exclude because main loading < .50		0	1	1
ang5						1	0	1
ang6	excluded					0	1	1
ang7	excluded					0	1	1
ang8						1	0	1
ang9_r						1	0	1
anx10_r						0	1	1
anx13_r		excluded (media is end point of scale)				0	1	1
anx14_r						0	1	1
anx16_r						1	0	1
anx2						1	0	1
anx3	excluded					0	1	1
anx4						0	1	1
anx5	excluded					0	1	1
anx6						0	1	1
anx7						1	0	1
anx8						1	0	1
anx9_r						1	0	1
guilt17_r	excluded					0	0	0
guilt18_r	excluded					0	0	0
guilt19	excluded					0	0	0
guilt20_r	excluded (because rest of guilt scale was excluded)					0	0	0
guilt21_r	excluded					0	0	0
guilt22	excluded					0	0	0
guilt23_r	excluded					0	0	0
guilt24	excluded					0	0	0
guilt25_r	excluded					0	0	0
guilt26_r	excluded					0	0	0
guilt27	excluded					0	0	0
guilt5	excluded					0	0	0
guilt6	excluded					0	0	0
guilt7	excluded					0	0	0
impg1						1	0	1
impg10_r						1	0	1
impg2						1	0	1
impg3						1	0	1
impg6_r						0	0	0
impg7_r						1	0	1
impg8_r						1	0	1
imps1	excluded					0	0	0
imps3						1	0	1
imps4_r				exclude because main loading < .50		0	0	0
imps5_r	excluded			exclude because main loading < .50		0	0	0
impw1						0	0	0
impw2						1	0	1
impw3_r						0	0	0
impw4_r						0	0	0
sad1						1	0	1
sad13_r	should have been excluded but was retained because it is opposite of sadness, retained for breadth of scale and because we wanted inverse coded items					0	1	1
sad14_r	excluded					0	0	0
sad16_r						1	0	1
sad2				exclude because crossloadings > .35		0	0	0
sad3						0	0	0
sad4			excluded because hopeless could be depression			0	0	0
sad5						1	0	1
sad6						1	0	1
sad7						1	0	1
sad8						0	0	0

## Sheet: Inter-item correlations Study 2
Anzahl corr <.20 in data = aff
	Delete all items with more than 20 low corr (red)	Delete all items with more than 10 low corr (red)	Delete all items with 4 or 5 corr <.20		last round
Ang1	15	8	4
Ang2	7	0	0	0	0
Ang3	6	1	0	0	0
Ang4	12	4	1	0	0
Ang5	4	0	0	0	0
Ang6	15	10
Ang7	24
Ang8	3	0	0	0	0
Ang9_r	9	3	1	0	0
Ang10_r	8	2	0	0	0
Ang11_r	17	10
Ang12_r	11	4	2	1	1	(deleted because content: i do not care is absence of any emotions)
Ang13_r	7	2	0	0	0
Ang15_r	8	2	0	0	0
Ang16_r	17	10
Anx2	3	0	0	0	0
Anx3	30
Anx4	9	4	2	0	0
Anx5	15	10
Anx6	8	4	1	0	0
Anx7	3	0	0	0	0
Anx8	8	3	1	1	0
Anx9_r	3	0	0	0	0
Anx10_r	7	2	1	0	0
Anx13_r	9	2	0	0	0
Anx14_r	5	1	0	0	0
Anx16_r	10	3	0	0	0
Sad1	2	0	0	0	0
Sad2	9	2	1	0	0
Sad3	4	0	0	0	0
Sad4	9	5	3	1	1	(deleted because content: hopeless could be depression)
Sad5	2	0	0	0	0
Sad6	9	5	2	0	0
Sad7	10	5	3	1	0
Sad8	4	0	0	0	0
Sad13_r	22
Sad14_r	21
Sad16_r	3	0	0	0	0
Guilt5	17	13
Guilt6	18	11
Guilt7	33
Guilt17_r	37
Guilt18_r	33
Guilt19	16	12
Guilt20_r	8	2	0	0	(deleted because guilt scale is gone)
Guilt21_r	11	5	2	2
Guilt22	39
Guilt23_r	14	8	5
Guilt24	27
Guilt25_r	8	5	4
Guilt26_r	18	11
Guilt27	12	9	5

## Sheet: Final 23 item solution
item name	english item	german item
ang8	I feel angry when I see how little is done to combat climate change.	Ich bin wütend, wenn ich sehe, wie wenig gegen den Klimawandel getan wird.
anx2	When I think about climate change, I worry about the future.	Wenn ich an den Klimawandel denke, sorge ich mich um die Zukunft.
sad16_r	I am not sad about climate change.	Ich bin nicht traurig über den Klimawandel.
ang5	I am enraged that we have missed many chances to stop climate change.	Ich bin wütend darüber, dass wir viele Chancen verpasst haben, den Klimawandel zu stoppen.
anx9_r	I do not fear for my future on this planet.	Ich habe keine Angst um meine Zukunft auf diesem Planeten.
sad1	News about climate change makes me feel depressed.	Nachrichten über den Klimawandel bedrücken mich.
ang10_r	I am not mad when others damage the climate.	Ich bin nicht sauer, wenn andere dem Klima schaden.
anx7	The uncertainty about how climate change will progress scares me.	Die Ungewissheit darüber, wie der Klimawandel voranschreiten wird, macht mir Angst.
sad5	I feel sad that climate change is causing people and animals to suffer.	Ich bin traurig darüber, dass Menschen und Tiere unter dem Klimawandel leiden.
ang15_r	I do not get upset when others ignore climate change.	Ich rege mich nicht auf, wenn andere den Klimawandel ignorieren.
anx8	I am scared that people will lose their homes because of climate change.	Ich habe Angst davor, dass Menschen durch den Klimawandel ihr zu Hause verlieren.
sad6	I feel sad that some parts of the environment will not recover from the effects of climate change.	Ich bin traurig darüber, dass sich manche Teile der Umwelt nicht mehr von den Auswirkungen des Klimawandels erholen werden.
ang9_r	I am not angry that some countries have missed their climate protection goals.	Ich bin nicht wütend darüber, dass manche Länder ihre Klimaschutzziele verfehlt haben.
sad7	The impact that climate change has had on the planet saddens me.	Die Auswirkungen, die der Klimawandel auf den Planeten hat, machen mich traurig.
anx16_r	I feel carefree when I think about climate change.	Ich fühle mich unbeschwert wenn ich an den Klimawandel denke.
impg1	Climate change drains all my energy.	Der Klimawandel raubt mir alle Energie.
impg10_r	My thoughts and feelings about climate change do not affect how well I sleep.	Meine Gedanken und Gefühle zum Klimawandel beeinflussen nicht, wie gut ich schlafe.
impg2	When I think about climate change, I get a headache or stomachache.	Wenn ich über den Klimawandel nachdenke, bekomme ich Kopf- oder Bauchschmerzen.
impg3	Because of climate change, I am overwhelmend by everyday activities.	Wegen des Klimawandels bin ich vom Alltag überfordert.
impg7_r	My thoughts and feelings about climate change do not negatively impact my everyday life.	Meine Gedanken und Gefühle zum Klimawandel beeinträchtigen meinen Alltag nicht.
impg8_r	I have no trouble mentally tuning out climate change.	Ich habe keine Schwierigkeiten damit, den Klimawandel gedanklich auszublenden.
imps3	Constant discussions about climate change are affecting my relationships.	Ständige Diskussionen über den Klimawandel beeinträchtigen meine Beziehungen.
impw2	When I think about climate change, I cannot bring myself to work/study.	Wenn ich an den Klimawandel denke, kann ich mich nicht aufraffen, zu arbeiten/lernen.
