# Supplementary material for: The climate change distress and impairment scale: Introduction of the measure and first findings on pro-environmental behavior
Source: Research Square preprint supplement (doi:10.21203/rs.3.rs-1986606/v1), 2022-08-26
Supplement: Supplementary file 1 [file 730c7401b1228bdece7ed65b.pdf]

Table S2. Demographic data for participants in the studies 1, 2, and 3.

|                                            | Study 1<br>N = 384                                |     | Study 2<br>N = 447                                 |     | Study 3<br>N = 374                                |     |
|--------------------------------------------|---------------------------------------------------|-----|----------------------------------------------------|-----|---------------------------------------------------|-----|
|                                            | %                                                 | n   | %                                                  | n   | %                                                 | n   |
| <b>Gender</b>                              |                                                   |     |                                                    |     |                                                   |     |
| female                                     | 39.3%                                             | 151 | 52.8%                                              | 236 | 50.3%                                             | 188 |
| male                                       | 58.3%                                             | 224 | 41.6%                                              | 186 | 46.5%                                             | 174 |
| transgender                                | -                                                 | -   | 0.7%                                               | 3   | 0.5%                                              | 2   |
| non-binary                                 | 1.3%                                              | 5   | 4.0%                                               | 18  | 2.3%                                              | 10  |
| gender-neutral                             | 0.78%                                             | 3   | 0.4%                                               | 2   | -                                                 | -   |
| other                                      | -                                                 | -   | 0.2%                                               | 1   | -                                                 | -   |
| do not want to disclose                    | 0.26%                                             | 1   | 0.2%                                               | 1   | -                                                 | -   |
| <b>Age</b>                                 |                                                   |     |                                                    |     |                                                   |     |
|                                            | 18 – 65 years, <i>M</i> = 26.41, <i>SD</i> = 8.68 |     | 18 – 75 years, <i>M</i> = 33.64, <i>SD</i> = 12.62 |     | 18 – 59 years, <i>M</i> = 30.71, <i>SD</i> = 9.18 |     |
| <b>Race</b>                                |                                                   |     |                                                    |     |                                                   |     |
| White                                      | 88.5%                                             | 340 | 78.3%                                              | 350 | 49.5%                                             | 185 |
| Black                                      | 3.1%                                              | 12  | 9.2%                                               | 41  | 21.4%                                             | 80  |
| Asian                                      | 2.9%                                              | 11  | 5.1%                                               | 23  | 11.0%                                             | 41  |
| Mixed-racial                               | 2.6%                                              | 10  | 4.0%                                               | 18  | 11.8%                                             | 44  |
| other                                      | 1.3%                                              | 5   | 2.5%                                               | 11  | 4.8%                                              | 18  |
| do not want to disclose                    | -                                                 | -   | 0.8%                                               | 4   | 0.3%                                              | 1   |
| NA                                         | 0.2%                                              | 6   | -                                                  | -   | 1.6%                                              | 6   |
| <b>Language</b>                            |                                                   |     |                                                    |     |                                                   |     |
| fluent                                     | 83.3%                                             | 320 | -                                                  | -   | -                                                 | -   |
| native                                     | 16.7%                                             | 64  | 100%                                               | 447 | 100%                                              | 374 |
| <b>Education</b>                           |                                                   |     |                                                    |     |                                                   |     |
| None (left school without degree)          | -                                                 | -   | 1.3%                                               | 6   | 2.4%                                              | 9   |
| None (still in school)                     | 2.3%                                              | 9   | 1.1%                                               | 5   | 2.4%                                              | 9   |
| Junior high school                         | 2.1%                                              | 8   | 0.2%                                               | 1   | 0.3%                                              | 1   |
| High school                                | 37.2%                                             | 143 | 33.6%                                              | 150 | 30.7%                                             | 115 |
| Undergraduate degree (Bachelor's)          | 32%                                               | 123 | 40.0%                                              | 179 | 35.3%                                             | 132 |
| Graduate degree (Master's)                 | 21.4%                                             | 82  | 18.3%                                              | 82  | 25.1%                                             | 94  |
| Ph.D. or advanced professional degree      | 2.9%                                              | 11  | 4.5%                                               | 20  | 1.9%                                              | 7   |
| do not want to disclose                    | 2.1%                                              | 8   | 0.8%                                               | 4   | 1.9%                                              | 7   |
| <b>Job</b>                                 |                                                   |     |                                                    |     |                                                   |     |
| Unemployed or job seeking                  | 16.7%                                             | 64  | 8.9%                                               | 40  | 8.3%                                              | 31  |
| Student (High school)                      | 9.4%                                              | 36  | 0.4%                                               | 2   | 0.8%                                              | 3   |
| Student (College/University) or apprentice | 30.7%                                             | 118 | 17.9%                                              | 80  | 16.6%                                             | 62  |
| (Self-)Employed                            | 40.6%                                             | 156 | 64.7%                                              | 289 | 71.7%                                             | 268 |
| Homemaker                                  | 0.8%                                              | 3   | 3.8%                                               | 17  | 1.9%                                              | 7   |
| Retired                                    | 0.3%                                              | 1   | 2.9%                                               | 13  | -                                                 | -   |
| Other                                      | 0.5%                                              | 2   | 1.1%                                               | 5   | 0.5%                                              | 2   |
| do not want to disclose                    | 1%                                                | 4   | 0.2%                                               | 1   | 0.3%                                              | 1   |

|                         |       |     |       |     |       |     |
|-------------------------|-------|-----|-------|-----|-------|-----|
| <b>Income</b>           |       |     |       |     |       |     |
| < 500 USD               | 35.2% | 135 | 17.9% | 82  | 14.4% | 54  |
| 500-1000 USD            | 18.5% | 71  | 11.4% | 51  | 10.7% | 40  |
| 1000-1500 USD           | 4.7%  | 48  | 9.2%  | 41  | 8.8%  | 33  |
| 1500-2000 USD           | 7.8%  | 30  | 16.1% | 72  | 17.6% | 66  |
| 2000-3000USD            | 7%    | 27  | 18.6% | 83  | 16%   | 60  |
| > 3000 USD              | 4.7%  | 18  | 15.0% | 67  | 19.5% | 73  |
| do not want to disclose | 14.3% | 55  | 11.9% | 53  | 12.8% | 48  |
| <b>Pathology</b>        |       |     |       |     |       |     |
| Yes                     | 21.1% | 81  | 39.6% | 177 | 24.9% | 93  |
| No                      | 75%   | 288 | 59.1% | 264 | 73.5% | 275 |
| Not sure                | 2.6%  | 10  | 0.9%  | 4   | 0.8%  | 3   |
| do not want to disclose | 1.3%  | 5   | 0.4%  | 2   | 0.8%  | 3   |
| <b>Therapy</b>          |       |     |       |     |       |     |
| Yes                     | 19.9% | 76  | 36.5% | 163 | 25.1% | 94  |
| No                      | 78.9% | 303 | 62.2% | 278 | 74.6% | 279 |
| Not sure                | 0.3%  | 1   | 0.9%  | 4   | -     | -   |
| do not want to disclose | 1%    | 4   | 0.4%  | 2   | 0.3%  | 1   |
| <b>Medication</b>       |       |     |       |     |       |     |
| Yes                     | 21.8% | 84  | 33.3% | 149 | 24.1% | 90  |
| No                      | 76.8% | 295 | 65.8% | 294 | 75.1% | 281 |
| Not sure                | 0.8%  | 3   | 0.2%  | 1   | 0.5%  | 2   |
| do not want to disclose | 0.5%  | 2   | 0.7%  | 3   | 0.3%  | 1   |
| <b>Country</b>          |       |     |       |     |       |     |
| Australia               | 0.5%  | 2   | 1.1%  | 5   | 0.3%  | 1   |
| Austria                 | 0.5%  | 2   | -     | -   | -     | -   |
| Belgium                 | 1%    | 4   | -     | -   | -     | -   |
| Canada                  | 0.3%  | 1   | 12.8% | 57  | 9.4%  | 35  |
| Czech Republic          | 0.3%  | 1   | -     | -   | -     | -   |
| Estonia                 | 1.3%  | 5   | -     | -   | -     | -   |
| Finland                 | 1.6%  | 6   | -     | -   | -     | -   |
| France                  | 0.5%  | 2   | -     | -   | -     | -   |
| Germany                 | 1.6%  | 6   | -     | -   | -     | -   |
| Greece                  | 5.2%  | 20  | -     | -   | -     | -   |
| Hungary                 | 2.1%  | 8   | 0.2%  | 1   | -     | -   |
| Ireland                 | 0.5%  | 2   | 6.9%  | 31  | 0.8%  | 3   |
| Israel                  | 0.5%  | 2   | -     | -   | -     | -   |
| Italy                   | 9.9%  | 38  | -     | -   | 0.3%  | 1   |
| Japan                   | 0.5%  | 2   | -     | -   | -     | -   |
| Latvia                  | 1%    | 4   | -     | -   | -     | -   |
| México                  | 0.5%  | 2   | -     | -   | -     | -   |
| Netherlands             | 2.6%  | 10  | -     | -   | 0.3%  | 1   |
| New Zealand             | 0.5%  | 2   | 0.7%  | 3   | 1.6%  | 6   |
| Norway                  | 0.5%  | 2   | -     | -   | -     | -   |
| Poland                  | 29.2% | 112 | -     | -   | -     | -   |
| Portugal                | 18.8% | 72  | -     | -   | -     | -   |
| Slovenia                | 0.5%  | 2   | -     | -   | -     | -   |
| South Africa            | 5.2%  | 20  | 2.5%  | 11  | 7.0%  | 26  |
| Spain                   | 4.2%  | 16  | 0.2%  | 1   | -     | -   |
| Sweden                  | 0.5%  | 2   | -     | -   | -     | -   |
| Ukraine                 | -     | -   | -     | -   | 0.3%  | 1   |
| United Kingdom          | 8.3%  | 32  | 32.0% | 143 | 42.5% | 159 |

|               |      |   |       |     |       |     |
|---------------|------|---|-------|-----|-------|-----|
| United States | 1.8% | 7 | 43.4% | 194 | 34.2% | 128 |
| NA            | -    | - | 0.2%  | 1   | 3.5%  | 13  |

---
