# Supplementary material for: The climate change distress and impairment scale: Introduction of the measure and first findings on pro-environmental behavior
Source: Research Square preprint supplement (doi:10.21203/rs.3.rs-1986606/v1), 2022-08-26
Supplement: Supplementary file 2 [file 0e02741c86aca18ec1d27014.xlsx]

## Sheet: Table S14
	ang1	ang2	ang3	ang4	ang5	ang6	ang7	ang8	ang9_r	ang10_r	ang11_r	ang12_r	ang13_r	ang15_r	ang16_r	anx2	anx3	anx4	anx5	anx6	anx7	anx8	anx9_r	anx10_r	anx13_r	anx14_r	anx16_r	sad1	sad2	sad3	sad4	sad5	sad6	sad7	sad8	sad13_r	sad14_r	sad16_r	guilt5	guilt6	guilt7	guilt17_r	guilt18_r	guilt19	guilt20_r	guilt21_r	guilt22	guilt23_r	guilt24
ang1	1	0.29	0.32	0.65	0.3	0.26	0.28	0.4	0.26	0.32	0.33	0.35	0.28	0.31	0.18	0.28	0.13	0.37	0.22	0.23	0.31	0.29	0.22	0.32	0.3	0.31	0.25	0.32	0.17	0.23	0.15	0.33	0.29	0.38	0.32	0.1	0.2	0.31	0.12	0.21	0.16	0.07	0.08	0.11	0.22	0.2	-0.03	0.16	0.03
ang2	0.29	1	0.45	0.4	0.36	0.37	0.38	0.41	0.33	0.35	0.32	0.28	0.3	0.41	0.22	0.38	0.13	0.3	0.2	0.32	0.38	0.39	0.3	0.3	0.25	0.34	0.3	0.38	0.37	0.36	0.36	0.33	0.36	0.28	0.38	0.17	0.14	0.31	0.21	0.3	0.13	0.11	0.11	0.25	0.3	0.26	0.14	0.28	0.25
ang3	0.32	0.45	1	0.39	0.6	0.47	0.41	0.59	0.46	0.46	0.26	0.3	0.45	0.58	0.3	0.53	0.28	0.45	0.36	0.49	0.52	0.44	0.38	0.43	0.42	0.54	0.3	0.47	0.4	0.38	0.45	0.4	0.5	0.47	0.48	0.25	0.2	0.51	0.23	0.23	0.12	0.06	0.14	0.23	0.26	0.29	0.12	0.29	0.2
ang4	0.65	0.4	0.39	1	0.36	0.22	0.36	0.44	0.29	0.32	0.25	0.34	0.27	0.41	0.14	0.31	0.13	0.33	0.23	0.23	0.31	0.29	0.28	0.32	0.24	0.34	0.22	0.37	0.32	0.26	0.26	0.36	0.31	0.3	0.37	0.04	0.08	0.33	0.15	0.27	0.19	0.09	0.12	0.22	0.26	0.31	0.08	0.22	0.16
ang5	0.3	0.36	0.6	0.36	1	0.42	0.42	0.72	0.51	0.44	0.28	0.32	0.41	0.48	0.25	0.49	0.24	0.46	0.28	0.45	0.47	0.44	0.42	0.39	0.48	0.48	0.25	0.51	0.49	0.39	0.52	0.43	0.49	0.45	0.56	0.25	0.2	0.5	0.2	0.26	0.19	0.04	0.09	0.27	0.24	0.3	0.13	0.23	0.23
ang6	0.26	0.37	0.47	0.22	0.42	1	0.29	0.47	0.34	0.34	0.17	0.21	0.2	0.23	0.29	0.36	0.24	0.35	0.33	0.46	0.35	0.24	0.21	0.25	0.29	0.29	0.31	0.37	0.26	0.37	0.37	0.36	0.44	0.37	0.33	0.3	0.23	0.31	0.09	0.13	0.02	-0.07	-0.08	0.16	0.14	0.18	0.01	0.09	0.1
ang7	0.28	0.38	0.41	0.36	0.42	0.29	1	0.41	0.3	0.33	0.17	0.2	0.18	0.34	0.07	0.26	0.13	0.27	0.14	0.27	0.21	0.26	0.21	0.19	0.19	0.28	0.09	0.29	0.31	0.23	0.27	0.28	0.29	0.19	0.29	0.04	-0.01	0.27	0.03	0.17	0.13	-0.05	0.03	0.11	0.15	0.27	0	0.13	0.07
ang8	0.4	0.41	0.59	0.44	0.72	0.47	0.41	1	0.52	0.45	0.31	0.35	0.42	0.45	0.36	0.55	0.3	0.5	0.36	0.52	0.56	0.46	0.37	0.43	0.51	0.5	0.35	0.54	0.41	0.42	0.49	0.54	0.52	0.5	0.57	0.29	0.2	0.52	0.22	0.31	0.23	0.07	0.08	0.28	0.28	0.3	0.11	0.22	0.22
ang9_r	0.26	0.33	0.46	0.29	0.51	0.34	0.3	0.52	1	0.49	0.35	0.33	0.4	0.46	0.32	0.32	0.15	0.36	0.27	0.36	0.38	0.33	0.42	0.44	0.48	0.5	0.34	0.39	0.34	0.32	0.35	0.35	0.38	0.35	0.37	0.35	0.27	0.46	0.08	0.23	0.07	0.11	0.13	0.16	0.26	0.34	0.02	0.28	0.13
ang10_r	0.32	0.35	0.46	0.32	0.44	0.34	0.33	0.45	0.49	1	0.43	0.35	0.43	0.5	0.33	0.36	0.14	0.34	0.3	0.37	0.36	0.28	0.39	0.48	0.46	0.47	0.33	0.34	0.31	0.26	0.27	0.34	0.39	0.34	0.31	0.29	0.29	0.45	0.06	0.29	0.09	0.11	0.1	0.09	0.3	0.34	-0.03	0.26	0.1
ang11_r	0.33	0.32	0.26	0.25	0.28	0.17	0.17	0.31	0.35	0.43	1	0.35	0.46	0.4	0.3	0.22	-0.03	0.2	0.17	0.18	0.2	0.18	0.31	0.39	0.34	0.34	0.35	0.23	0.23	0.23	0.14	0.2	0.18	0.24	0.23	0.23	0.31	0.37	0.05	0.17	-0.03	0.13	0.12	0.01	0.28	0.28	-0.12	0.27	0.03
ang12_r	0.35	0.28	0.3	0.34	0.32	0.21	0.2	0.35	0.33	0.35	0.35	1	0.42	0.5	0.24	0.31	0.1	0.25	0.28	0.33	0.31	0.31	0.3	0.38	0.37	0.48	0.35	0.36	0.35	0.32	0.17	0.32	0.29	0.32	0.36	0.17	0.2	0.41	0.16	0.37	0.15	0.12	0.17	0.16	0.42	0.42	0.02	0.39	0.18
ang13_r	0.28	0.3	0.45	0.27	0.41	0.2	0.18	0.42	0.4	0.43	0.46	0.42	1	0.52	0.32	0.33	0.12	0.26	0.24	0.29	0.34	0.33	0.46	0.46	0.43	0.47	0.36	0.39	0.38	0.38	0.32	0.3	0.3	0.31	0.41	0.25	0.26	0.48	0.17	0.23	0.09	0.22	0.22	0.13	0.33	0.32	-0.01	0.32	0.14
ang15_r	0.31	0.41	0.58	0.41	0.48	0.23	0.34	0.45	0.46	0.5	0.4	0.5	0.52	1	0.37	0.44	0.15	0.35	0.31	0.35	0.42	0.36	0.46	0.48	0.49	0.62	0.44	0.42	0.41	0.34	0.36	0.36	0.35	0.36	0.44	0.33	0.24	0.58	0.19	0.29	0.16	0.16	0.25	0.16	0.38	0.45	0.01	0.49	0.13
ang16_r	0.18	0.22	0.3	0.14	0.25	0.29	0.07	0.36	0.32	0.33	0.3	0.24	0.32	0.37	1	0.39	0.12	0.26	0.25	0.3	0.33	0.17	0.28	0.31	0.34	0.41	0.6	0.26	0.22	0.3	0.32	0.29	0.31	0.37	0.26	0.48	0.44	0.43	0.1	0.03	-0.06	0.06	0	0.05	0.22	0.18	0	0.17	0.03
anx2	0.28	0.38	0.53	0.31	0.49	0.36	0.26	0.55	0.32	0.36	0.22	0.31	0.33	0.44	0.39	1	0.27	0.49	0.41	0.49	0.7	0.51	0.41	0.49	0.47	0.56	0.38	0.46	0.38	0.41	0.45	0.48	0.51	0.52	0.47	0.29	0.24	0.54	0.29	0.22	0.17	0.07	0.14	0.28	0.23	0.28	0.2	0.24	0.21
anx3	0.13	0.13	0.28	0.13	0.24	0.24	0.13	0.3	0.15	0.14	-0.03	0.1	0.12	0.15	0.12	0.27	1	0.27	0.21	0.3	0.3	0.19	0.14	0.11	0.21	0.2	0.15	0.23	0.14	0.21	0.34	0.22	0.3	0.23	0.23	0.15	0.08	0.23	0.15	0.02	0.07	-0.08	0.03	0.15	0.11	0.07	0.1	0.02	0.24
anx4	0.37	0.3	0.45	0.33	0.46	0.35	0.27	0.5	0.36	0.34	0.2	0.25	0.26	0.35	0.26	0.49	0.27	1	0.38	0.54	0.5	0.39	0.31	0.34	0.37	0.44	0.29	0.36	0.27	0.32	0.32	0.52	0.43	0.54	0.36	0.28	0.21	0.45	0.21	0.18	0.18	0.03	0.09	0.22	0.23	0.25	0.1	0.18	0.19
anx5	0.22	0.2	0.36	0.23	0.28	0.33	0.14	0.36	0.27	0.3	0.17	0.28	0.24	0.31	0.25	0.41	0.21	0.38	1	0.37	0.4	0.3	0.22	0.31	0.3	0.37	0.3	0.33	0.15	0.3	0.26	0.31	0.34	0.42	0.28	0.24	0.23	0.35	0.17	0.17	0.08	0.11	0.14	0.19	0.13	0.13	0.03	0.12	0.21
anx6	0.23	0.32	0.49	0.23	0.45	0.46	0.27	0.52	0.36	0.37	0.18	0.33	0.29	0.35	0.3	0.49	0.3	0.54	0.37	1	0.5	0.41	0.34	0.41	0.41	0.49	0.34	0.43	0.3	0.4	0.32	0.53	0.59	0.52	0.38	0.3	0.26	0.49	0.28	0.18	0.16	0.07	0.09	0.28	0.24	0.25	0.16	0.16	0.22
anx7	0.31	0.38	0.52	0.31	0.47	0.35	0.21	0.56	0.38	0.36	0.2	0.31	0.34	0.42	0.33	0.7	0.3	0.5	0.4	0.5	1	0.43	0.4	0.44	0.43	0.53	0.34	0.48	0.35	0.43	0.5	0.46	0.48	0.48	0.46	0.26	0.22	0.5	0.29	0.25	0.22	0.14	0.18	0.3	0.26	0.28	0.18	0.24	0.25
anx8	0.29	0.39	0.44	0.29	0.44	0.24	0.26	0.46	0.33	0.28	0.18	0.31	0.33	0.36	0.17	0.51	0.19	0.39	0.3	0.41	0.43	1	0.37	0.39	0.41	0.45	0.24	0.44	0.42	0.37	0.42	0.44	0.41	0.39	0.52	0.16	0.18	0.39	0.22	0.24	0.21	0.11	0.09	0.27	0.2	0.19	0.2	0.24	0.29
anx9_r	0.22	0.3	0.38	0.28	0.42	0.21	0.21	0.37	0.42	0.39	0.31	0.3	0.46	0.46	0.28	0.41	0.14	0.31	0.22	0.34	0.4	0.37	1	0.44	0.5	0.58	0.31	0.31	0.38	0.31	0.4	0.32	0.32	0.25	0.38	0.26	0.21	0.5	0.21	0.22	0.16	0.24	0.26	0.22	0.29	0.41	0.03	0.32	0.22
anx10_r	0.32	0.3	0.43	0.32	0.39	0.25	0.19	0.43	0.44	0.48	0.39	0.38	0.46	0.48	0.31	0.49	0.11	0.34	0.31	0.41	0.44	0.39	0.44	1	0.63	0.61	0.37	0.36	0.36	0.28	0.31	0.38	0.4	0.4	0.4	0.29	0.27	0.55	0.21	0.3	0.14	0.21	0.26	0.18	0.39	0.38	0.03	0.33	0.1
anx13_r	0.3	0.25	0.42	0.24	0.48	0.29	0.19	0.51	0.48	0.46	0.34	0.37	0.43	0.49	0.34	0.47	0.21	0.37	0.3	0.41	0.43	0.41	0.5	0.63	1	0.6	0.42	0.38	0.33	0.35	0.35	0.43	0.43	0.41	0.41	0.32	0.32	0.53	0.19	0.19	0.15	0.18	0.18	0.21	0.31	0.33	0.07	0.3	0.16
anx14_r	0.31	0.34	0.54	0.34	0.48	0.29	0.28	0.5	0.5	0.47	0.34	0.48	0.47	0.62	0.41	0.56	0.2	0.44	0.37	0.49	0.53	0.45	0.58	0.61	0.6	1	0.45	0.44	0.45	0.38	0.43	0.46	0.46	0.47	0.46	0.36	0.3	0.69	0.25	0.19	0.16	0.19	0.29	0.25	0.39	0.43	0.09	0.39	0.17
anx16_r	0.25	0.3	0.3	0.22	0.25	0.31	0.09	0.35	0.34	0.33	0.35	0.35	0.36	0.44	0.6	0.38	0.15	0.29	0.3	0.34	0.34	0.24	0.31	0.37	0.42	0.45	1	0.38	0.21	0.39	0.28	0.39	0.38	0.45	0.36	0.5	0.46	0.5	0.23	0.16	0.05	0.14	0.1	0.17	0.32	0.25	0.05	0.28	0.14
sad1	0.32	0.38	0.47	0.37	0.51	0.37	0.29	0.54	0.39	0.34	0.23	0.36	0.39	0.42	0.26	0.46	0.23	0.36	0.33	0.43	0.48	0.44	0.31	0.36	0.38	0.44	0.38	1	0.54	0.57	0.58	0.52	0.47	0.51	0.67	0.2	0.26	0.5	0.29	0.31	0.25	0.06	0.19	0.39	0.29	0.29	0.2	0.26	0.33
sad2	0.17	0.37	0.4	0.32	0.49	0.26	0.31	0.41	0.34	0.31	0.23	0.35	0.38	0.41	0.22	0.38	0.14	0.27	0.15	0.3	0.35	0.42	0.38	0.36	0.33	0.45	0.21	0.54	1	0.52	0.49	0.38	0.42	0.35	0.62	0.12	0.18	0.43	0.21	0.25	0.16	0.04	0.11	0.25	0.29	0.35	0.14	0.24	0.22
sad3	0.23	0.36	0.38	0.26	0.39	0.37	0.23	0.42	0.32	0.26	0.23	0.32	0.38	0.34	0.3	0.41	0.21	0.32	0.3	0.4	0.43	0.37	0.31	0.28	0.35	0.38	0.39	0.57	0.52	1	0.47	0.42	0.42	0.39	0.54	0.21	0.28	0.41	0.23	0.26	0.17	0.05	0.08	0.25	0.23	0.21	0.15	0.22	0.26
sad4	0.15	0.36	0.45	0.26	0.52	0.37	0.27	0.49	0.35	0.27	0.14	0.17	0.32	0.36	0.32	0.45	0.34	0.32	0.26	0.32	0.5	0.42	0.4	0.31	0.35	0.43	0.28	0.58	0.49	0.47	1	0.4	0.36	0.4	0.58	0.27	0.18	0.48	0.19	0.23	0.19	0.03	0.11	0.33	0.21	0.2	0.22	0.22	0.29
sad5	0.33	0.33	0.4	0.36	0.43	0.36	0.28	0.54	0.35	0.34	0.2	0.32	0.3	0.36	0.29	0.48	0.22	0.52	0.31	0.53	0.46	0.44	0.32	0.38	0.43	0.46	0.39	0.52	0.38	0.42	0.4	1	0.55	0.53	0.51	0.25	0.24	0.45	0.25	0.28	0.27	0.05	0.15	0.31	0.25	0.24	0.21	0.23	0.2
sad6	0.29	0.36	0.5	0.31	0.49	0.44	0.29	0.52	0.38	0.39	0.18	0.29	0.3	0.35	0.31	0.51	0.3	0.43	0.34	0.59	0.48	0.41	0.32	0.4	0.43	0.46	0.38	0.47	0.42	0.42	0.36	0.55	1	0.54	0.44	0.3	0.28	0.45	0.25	0.19	0.21	0.05	0.03	0.28	0.22	0.2	0.17	0.09	0.18
sad7	0.38	0.28	0.47	0.3	0.45	0.37	0.19	0.5	0.35	0.34	0.24	0.32	0.31	0.36	0.37	0.52	0.23	0.54	0.42	0.52	0.48	0.39	0.25	0.4	0.41	0.47	0.45	0.51	0.35	0.39	0.4	0.53	0.54	1	0.48	0.32	0.37	0.47	0.2	0.15	0.2	0.05	0.08	0.2	0.2	0.19	0.09	0.15	0.16
sad8	0.32	0.38	0.48	0.37	0.56	0.33	0.29	0.57	0.37	0.31	0.23	0.36	0.41	0.44	0.26	0.47	0.23	0.36	0.28	0.38	0.46	0.52	0.38	0.4	0.41	0.46	0.36	0.67	0.62	0.54	0.58	0.51	0.44	0.48	1	0.16	0.18	0.51	0.31	0.33	0.28	0.08	0.19	0.34	0.32	0.32	0.24	0.29	0.28
sad13_r	0.1	0.17	0.25	0.04	0.25	0.3	0.04	0.29	0.35	0.29	0.23	0.17	0.25	0.33	0.48	0.29	0.15	0.28	0.24	0.3	0.26	0.16	0.26	0.29	0.32	0.36	0.5	0.2	0.12	0.21	0.27	0.25	0.3	0.32	0.16	1	0.41	0.32	0.1	-0.04	0.01	0.1	0	0.04	0.16	0.16	-0.02	0.11	0.07
sad14_r	0.2	0.14	0.2	0.08	0.2	0.23	-0.01	0.2	0.27	0.29	0.31	0.2	0.26	0.24	0.44	0.24	0.08	0.21	0.23	0.26	0.22	0.18	0.21	0.27	0.32	0.3	0.46	0.26	0.18	0.28	0.18	0.24	0.28	0.37	0.18	0.41	1	0.28	0.06	0	0	0.06	-0.06	0.02	0.13	0.07	-0.02	0.11	0.04
sad16_r	0.31	0.31	0.51	0.33	0.5	0.31	0.27	0.52	0.46	0.45	0.37	0.41	0.48	0.58	0.43	0.54	0.23	0.45	0.35	0.49	0.5	0.39	0.5	0.55	0.53	0.69	0.5	0.5	0.43	0.41	0.48	0.45	0.45	0.47	0.51	0.32	0.28	1	0.24	0.25	0.18	0.21	0.31	0.24	0.41	0.46	0.06	0.39	0.13
guilt5	0.12	0.21	0.23	0.15	0.2	0.09	0.03	0.22	0.08	0.06	0.05	0.16	0.17	0.19	0.1	0.29	0.15	0.21	0.17	0.28	0.29	0.22	0.21	0.21	0.19	0.25	0.23	0.29	0.21	0.23	0.19	0.25	0.25	0.2	0.31	0.1	0.06	0.24	1	0.25	0.3	0.46	0.47	0.47	0.31	0.23	0.36	0.24	0.33
guilt6	0.21	0.3	0.23	0.27	0.26	0.13	0.17	0.31	0.23	0.29	0.17	0.37	0.23	0.29	0.03	0.22	0.02	0.18	0.17	0.18	0.25	0.24	0.22	0.3	0.19	0.19	0.16	0.31	0.25	0.26	0.23	0.28	0.19	0.15	0.33	-0.04	0	0.25	0.25	1	0.21	0.16	0.26	0.3	0.39	0.33	0.16	0.4	0.18
guilt7	0.16	0.13	0.12	0.19	0.19	0.02	0.13	0.23	0.07	0.09	-0.03	0.15	0.09	0.16	-0.06	0.17	0.07	0.18	0.08	0.16	0.22	0.21	0.16	0.14	0.15	0.16	0.05	0.25	0.16	0.17	0.19	0.27	0.21	0.2	0.28	0.01	0	0.18	0.3	0.21	1	0.25	0.23	0.31	0.18	0.14	0.3	0.2	0.34
guilt17_r	0.07	0.11	0.06	0.09	0.04	-0.07	-0.05	0.07	0.11	0.11	0.13	0.12	0.22	0.16	0.06	0.07	-0.08	0.03	0.11	0.07	0.14	0.11	0.24	0.21	0.18	0.19	0.14	0.06	0.04	0.05	0.03	0.05	0.05	0.05	0.08	0.1	0.06	0.21	0.46	0.16	0.25	1	0.61	0.34	0.3	0.23	0.18	0.34	0.16
guilt18_r	0.08	0.11	0.14	0.12	0.09	-0.08	0.03	0.08	0.13	0.1	0.12	0.17	0.22	0.25	0	0.14	0.03	0.09	0.14	0.09	0.18	0.09	0.26	0.26	0.18	0.29	0.1	0.19	0.11	0.08	0.11	0.15	0.03	0.08	0.19	0	-0.06	0.31	0.47	0.26	0.23	0.61	1	0.33	0.43	0.36	0.23	0.44	0.19
guilt19	0.11	0.25	0.23	0.22	0.27	0.16	0.11	0.28	0.16	0.09	0.01	0.16	0.13	0.16	0.05	0.28	0.15	0.22	0.19	0.28	0.3	0.27	0.22	0.18	0.21	0.25	0.17	0.39	0.25	0.25	0.33	0.31	0.28	0.2	0.34	0.04	0.02	0.24	0.47	0.3	0.31	0.34	0.33	1	0.26	0.22	0.46	0.27	0.44
guilt20_r	0.22	0.3	0.26	0.26	0.24	0.14	0.15	0.28	0.26	0.3	0.28	0.42	0.33	0.38	0.22	0.23	0.11	0.23	0.13	0.24	0.26	0.2	0.29	0.39	0.31	0.39	0.32	0.29	0.29	0.23	0.21	0.25	0.22	0.2	0.32	0.16	0.13	0.41	0.31	0.39	0.18	0.3	0.43	0.26	1	0.65	0.16	0.5	0.25
guilt21_r	0.2	0.26	0.29	0.31	0.3	0.18	0.27	0.3	0.34	0.34	0.28	0.42	0.32	0.45	0.18	0.28	0.07	0.25	0.13	0.25	0.28	0.19	0.41	0.38	0.33	0.43	0.25	0.29	0.35	0.21	0.2	0.24	0.2	0.19	0.32	0.16	0.07	0.46	0.23	0.33	0.14	0.23	0.36	0.22	0.65	1	0.07	0.51	0.1
guilt22	-0.03	0.14	0.12	0.08	0.13	0.01	0	0.11	0.02	-0.03	-0.12	0.02	-0.01	0.01	0	0.2	0.1	0.1	0.03	0.16	0.18	0.2	0.03	0.03	0.07	0.09	0.05	0.2	0.14	0.15	0.22	0.21	0.17	0.09	0.24	-0.02	-0.02	0.06	0.36	0.16	0.3	0.18	0.23	0.46	0.16	0.07	1	0.15	0.4
guilt23_r	0.16	0.28	0.29	0.22	0.23	0.09	0.13	0.22	0.28	0.26	0.27	0.39	0.32	0.49	0.17	0.24	0.02	0.18	0.12	0.16	0.24	0.24	0.32	0.33	0.3	0.39	0.28	0.26	0.24	0.22	0.22	0.23	0.09	0.15	0.29	0.11	0.11	0.39	0.24	0.4	0.2	0.34	0.44	0.27	0.5	0.51	0.15	1	0.19
guilt24	0.03	0.25	0.2	0.16	0.23	0.1	0.07	0.22	0.13	0.1	0.03	0.18	0.14	0.13	0.03	0.21	0.24	0.19	0.21	0.22	0.25	0.29	0.22	0.1	0.16	0.17	0.14	0.33	0.22	0.26	0.29	0.2	0.18	0.16	0.28	0.07	0.04	0.13	0.33	0.18	0.34	0.16	0.19	0.44	0.25	0.1	0.4	0.19	1
guilt25_r	0.27	0.22	0.26	0.29	0.23	0.13	0.1	0.27	0.32	0.33	0.29	0.55	0.39	0.41	0.26	0.29	0.11	0.17	0.21	0.22	0.31	0.27	0.33	0.38	0.41	0.42	0.33	0.3	0.27	0.29	0.17	0.24	0.19	0.19	0.33	0.21	0.24	0.36	0.29	0.31	0.21	0.28	0.31	0.26	0.59	0.45	0.19	0.44	0.26
guilt26_r	0.15	0.26	0.19	0.19	0.28	0.04	0.12	0.22	0.23	0.28	0.23	0.4	0.29	0.37	0.04	0.21	0.06	0.19	0.1	0.16	0.21	0.21	0.3	0.36	0.33	0.31	0.17	0.23	0.28	0.21	0.2	0.25	0.13	0.13	0.34	0.04	0.02	0.33	0.25	0.44	0.18	0.26	0.35	0.22	0.53	0.45	0.15	0.47	0.18
guilt27	0.17	0.24	0.26	0.19	0.36	0.11	0.16	0.32	0.13	0.2	0.12	0.19	0.28	0.23	0.1	0.27	0.21	0.23	0.18	0.24	0.29	0.31	0.24	0.16	0.24	0.23	0.23	0.42	0.34	0.35	0.31	0.28	0.25	0.26	0.48	0.07	0.09	0.27	0.48	0.29	0.32	0.23	0.25	0.45	0.29	0.2	0.35	0.25	0.46
[truncated: 3 more columns]
