# Supplementary material for: The climate change distress and impairment scale: Introduction of the measure and first findings on pro-environmental behavior
Source: Research Square preprint supplement (doi:10.21203/rs.3.rs-1986606/v1), 2022-08-26
Supplement: Supplementary file 3 [file 39f830d690f138fd1e47a46f.xlsx]

## Sheet: Table S5
	sad1	sad2	sad3	sad4	sad5	sad6	sad7	sad8	sad9_r	sad10_r	sad11_r	sad12_r	sad13_r	sad14_r	sad15_r	sad16_r
sad1	1	0.38	0.39	0.41	0.32	0.29	0.44	0.37	0.24	0.32	0.42	0.14	0.33	0.16	0.33	0.43
sad2	0.38	1	0.5	0.56	0.14	0.11	0.27	0.55	0.05	0.07	0.22	0.03	0.15	0.04	0.22	0.25
sad3	0.39	0.5	1	0.57	0.21	0.26	0.39	0.51	0.14	0.26	0.35	0.07	0.28	0.14	0.31	0.37
sad4	0.41	0.56	0.57	1	0.26	0.23	0.41	0.53	0.09	0.17	0.27	0.09	0.27	0.12	0.24	0.29
sad5	0.32	0.14	0.21	0.26	1	0.55	0.52	0.25	0.42	0.42	0.44	0.15	0.38	0.26	0.35	0.45
sad6	0.29	0.11	0.26	0.23	0.55	1	0.52	0.26	0.46	0.47	0.48	0.11	0.45	0.29	0.42	0.49
sad7	0.44	0.27	0.39	0.41	0.52	0.52	1	0.36	0.38	0.38	0.47	0.27	0.46	0.25	0.41	0.46
sad8	0.37	0.55	0.51	0.53	0.25	0.26	0.36	1	0.05	0.19	0.26	0.12	0.32	0.12	0.27	0.38
sad9_r	0.24	0.05	0.14	0.09	0.42	0.46	0.38	0.05	1	0.57	0.43	0.12	0.36	0.23	0.39	0.42
sad10_r	0.32	0.07	0.26	0.17	0.42	0.47	0.38	0.19	0.57	1	0.46	0.22	0.42	0.29	0.4	0.46
sad11_r	0.42	0.22	0.35	0.27	0.44	0.48	0.47	0.26	0.43	0.46	1	0.15	0.47	0.21	0.53	0.53
sad12_r	0.14	0.03	0.07	0.09	0.15	0.11	0.27	0.12	0.12	0.22	0.15	1	0.27	0.24	0.16	0.14
sad13_r	0.33	0.15	0.28	0.27	0.38	0.45	0.46	0.32	0.36	0.42	0.47	0.27	1	0.38	0.37	0.5
sad14_r	0.16	0.04	0.14	0.12	0.26	0.29	0.25	0.12	0.23	0.29	0.21	0.24	0.38	1	0.33	0.32
sad15_r	0.33	0.22	0.31	0.24	0.35	0.42	0.41	0.27	0.39	0.4	0.53	0.16	0.37	0.33	1	0.5
sad16_r	0.43	0.25	0.37	0.29	0.45	0.49	0.46	0.38	0.42	0.46	0.53	0.14	0.5	0.32	0.5	1
