# Supplementary material for: The climate change distress and impairment scale: Introduction of the measure and first findings on pro-environmental behavior
Source: Research Square preprint supplement (doi:10.21203/rs.3.rs-1986606/v1), 2022-08-26
Supplement: Supplementary file 4 [file 45c1f72447a477c3a38eac74.xlsx]

## Sheet: Table S8
	impg1	impg2	impg3	impg4	impg5	impg6_r	impg7_r	impg8_r	impg9_r	impg10_r	imps1	imps2	imps3	imps4_r	imps5_r	imps6_r	impw1	impw2	impw3_r	impw4_r
impg1	1	0.53	0.61	0.1	0.31	0.37	0.45	0.36	0.16	0.46	0.33	0.39	0.43	0.37	0.33	-0.03	0.5	0.51	0.42	0.43
impg2	0.53	1	0.58	0.05	0.29	0.34	0.39	0.34	0.06	0.39	0.31	0.31	0.42	0.3	0.22	0	0.56	0.51	0.4	0.32
impg3	0.61	0.58	1	0.11	0.32	0.36	0.47	0.36	0.14	0.46	0.38	0.38	0.51	0.34	0.31	0.03	0.57	0.62	0.46	0.4
impg4	0.1	0.05	0.11	1	-0.11	-0.09	-0.01	0.01	0.13	0.08	0	0.04	0.13	-0.01	0.05	0.17	0.04	0.15	0.1	0.13
impg5	0.31	0.29	0.32	-0.11	1	0.28	0.26	0.26	0.03	0.31	0.28	0.36	0.36	0.28	0.16	-0.11	0.33	0.32	0.29	0.27
impg6_r	0.37	0.34	0.36	-0.09	0.28	1	0.48	0.33	0.11	0.34	0.3	0.22	0.23	0.35	0.26	-0.01	0.38	0.33	0.34	0.32
impg7_r	0.45	0.39	0.47	-0.01	0.26	0.48	1	0.45	0.07	0.4	0.38	0.23	0.24	0.35	0.32	-0.04	0.5	0.45	0.4	0.35
impg8_r	0.36	0.34	0.36	0.01	0.26	0.33	0.45	1	0.19	0.4	0.25	0.23	0.25	0.25	0.3	0.04	0.4	0.43	0.47	0.44
impg9_r	0.16	0.06	0.14	0.13	0.03	0.11	0.07	0.19	1	0.13	0.06	0.13	0.11	0.08	0.21	0.08	0.08	0.2	0.24	0.3
impg10_r	0.46	0.39	0.46	0.08	0.31	0.34	0.4	0.4	0.13	1	0.17	0.39	0.39	0.22	0.31	0.14	0.39	0.55	0.46	0.52
imps1	0.33	0.31	0.38	0	0.28	0.3	0.38	0.25	0.06	0.17	1	0.3	0.36	0.37	0.18	-0.09	0.37	0.31	0.22	0.24
imps2	0.39	0.31	0.38	0.04	0.36	0.22	0.23	0.23	0.13	0.39	0.3	1	0.52	0.38	0.26	0.04	0.26	0.38	0.35	0.3
imps3	0.43	0.42	0.51	0.13	0.36	0.23	0.24	0.25	0.11	0.39	0.36	0.52	1	0.3	0.26	0.09	0.35	0.52	0.33	0.4
imps4_r	0.37	0.3	0.34	-0.01	0.28	0.35	0.35	0.25	0.08	0.22	0.37	0.38	0.3	1	0.24	-0.1	0.31	0.29	0.26	0.27
imps5_r	0.33	0.22	0.31	0.05	0.16	0.26	0.32	0.3	0.21	0.31	0.18	0.26	0.26	0.24	1	0.14	0.21	0.34	0.32	0.28
imps6_r	-0.03	0	0.03	0.17	-0.11	-0.01	-0.04	0.04	0.08	0.14	-0.09	0.04	0.09	-0.1	0.14	1	-0.03	0.09	0.13	0.12
impw1	0.5	0.56	0.57	0.04	0.33	0.38	0.5	0.4	0.08	0.39	0.37	0.26	0.35	0.31	0.21	-0.03	1	0.55	0.46	0.31
impw2	0.51	0.51	0.62	0.15	0.32	0.33	0.45	0.43	0.2	0.55	0.31	0.38	0.52	0.29	0.34	0.09	0.55	1	0.59	0.51
impw3_r	0.42	0.4	0.46	0.1	0.29	0.34	0.4	0.47	0.24	0.46	0.22	0.35	0.33	0.26	0.32	0.13	0.46	0.59	1	0.57
impw4_r	0.43	0.32	0.4	0.13	0.27	0.32	0.35	0.44	0.3	0.52	0.24	0.3	0.4	0.27	0.28	0.12	0.31	0.51	0.57	1
