# Supplementary material for: The climate change distress and impairment scale: Introduction of the measure and first findings on pro-environmental behavior
Source: Research Square preprint supplement (doi:10.21203/rs.3.rs-1986606/v1), 2022-08-26
Supplement: Supplementary file 5 [file 4ead2ae580f0b082c8d94fde.xlsx]

## Sheet: Table S18
	ang5	ang8	ang9_r	ang10_r	ang15_r	anx2	anx7	anx8	anx9_r	anx16_r	sad1	sad5	sad6	sad7	sad16_r
ang5	1	0.54	0.33	0.27	0.4	0.41	0.47	0.39	0.22	0.3	0.39	0.41	0.45	0.5	0.34
ang8	0.54	1	0.33	0.36	0.39	0.53	0.55	0.4	0.31	0.33	0.52	0.49	0.55	0.57	0.38
ang9_r	0.33	0.33	1	0.45	0.6	0.22	0.34	0.23	0.42	0.48	0.22	0.27	0.28	0.26	0.53
ang10_r	0.27	0.36	0.45	1	0.57	0.28	0.29	0.16	0.41	0.49	0.28	0.23	0.2	0.27	0.57
ang15_r	0.4	0.39	0.6	0.57	1	0.29	0.39	0.33	0.43	0.51	0.28	0.26	0.29	0.35	0.61
anx2	0.41	0.53	0.22	0.28	0.29	1	0.61	0.48	0.28	0.34	0.5	0.52	0.56	0.61	0.37
anx7	0.47	0.55	0.34	0.29	0.39	0.61	1	0.49	0.33	0.37	0.55	0.58	0.62	0.68	0.35
anx8	0.39	0.4	0.23	0.16	0.33	0.48	0.49	1	0.24	0.24	0.37	0.43	0.48	0.51	0.23
anx9_r	0.22	0.31	0.42	0.41	0.43	0.28	0.33	0.24	1	0.37	0.19	0.15	0.19	0.22	0.48
anx16_r	0.3	0.33	0.48	0.49	0.51	0.34	0.37	0.24	0.37	1	0.29	0.25	0.31	0.3	0.54
sad1	0.39	0.52	0.22	0.28	0.28	0.5	0.55	0.37	0.19	0.29	1	0.4	0.52	0.54	0.32
sad5	0.41	0.49	0.27	0.23	0.26	0.52	0.58	0.43	0.15	0.25	0.4	1	0.64	0.66	0.3
sad6	0.45	0.55	0.28	0.2	0.29	0.56	0.62	0.48	0.19	0.31	0.52	0.64	1	0.68	0.27
sad7	0.5	0.57	0.26	0.27	0.35	0.61	0.68	0.51	0.22	0.3	0.54	0.66	0.68	1	0.34
sad16_r	0.34	0.38	0.53	0.57	0.61	0.37	0.35	0.23	0.48	0.54	0.32	0.3	0.27	0.34	1
