# Supplementary material for: The climate change distress and impairment scale: Introduction of the measure and first findings on pro-environmental behavior
Source: Research Square preprint supplement (doi:10.21203/rs.3.rs-1986606/v1), 2022-08-26
Supplement: Supplementary file 6 [file 6507e2d4124179cdf06cb968.xlsx]

## Sheet: Table S4
	ang1	ang2	ang3	ang4	ang5	ang6	ang7	ang8	ang9_r	ang10_r	ang11_r	ang12_r	ang13_r	ang14_r	ang15_r	ang16_r
ang1	1	0.23	0.34	0.41	0.26	0.29	0.2	0.35	0.4	0.33	0.31	0.36	0.26	0.13	0.31	0.33
ang2	0.23	1	0.25	0.34	0.22	0.23	0.31	0.31	0.26	0.13	0.32	0.08	0.19	0.1	0.21	0.13
ang3	0.34	0.25	1	0.44	0.5	0.43	0.4	0.5	0.48	0.39	0.37	0.25	0.38	0.13	0.51	0.4
ang4	0.41	0.34	0.44	1	0.4	0.33	0.33	0.44	0.38	0.44	0.43	0.35	0.3	0.11	0.5	0.34
ang5	0.26	0.22	0.5	0.4	1	0.38	0.38	0.56	0.38	0.31	0.3	0.29	0.32	0.16	0.44	0.38
ang6	0.29	0.23	0.43	0.33	0.38	1	0.31	0.39	0.43	0.35	0.42	0.26	0.35	0.1	0.43	0.34
ang7	0.2	0.31	0.4	0.33	0.38	0.31	1	0.42	0.31	0.25	0.3	0.17	0.32	0.17	0.41	0.25
ang8	0.35	0.31	0.5	0.44	0.56	0.39	0.42	1	0.45	0.41	0.34	0.31	0.4	0.17	0.53	0.46
ang9_r	0.4	0.26	0.48	0.38	0.38	0.43	0.31	0.45	1	0.5	0.39	0.36	0.41	0.16	0.49	0.42
ang10_r	0.33	0.13	0.39	0.44	0.31	0.35	0.25	0.41	0.5	1	0.43	0.39	0.45	0.16	0.47	0.37
ang11_r	0.31	0.32	0.37	0.43	0.3	0.42	0.3	0.34	0.39	0.43	1	0.33	0.41	0.17	0.43	0.29
ang12_r	0.36	0.08	0.25	0.35	0.29	0.26	0.17	0.31	0.36	0.39	0.33	1	0.33	0	0.41	0.3
ang13_r	0.26	0.19	0.38	0.3	0.32	0.35	0.32	0.4	0.41	0.45	0.41	0.33	1	0.18	0.57	0.35
ang14_r	0.13	0.1	0.13	0.11	0.16	0.1	0.17	0.17	0.16	0.16	0.17	0	0.18	1	0.15	0.26
ang15_r	0.31	0.21	0.51	0.5	0.44	0.43	0.41	0.53	0.49	0.47	0.43	0.41	0.57	0.15	1	0.46
ang16_r	0.33	0.13	0.4	0.34	0.38	0.34	0.25	0.46	0.42	0.37	0.29	0.3	0.35	0.26	0.46	1
