# Supplementary material for: The climate change distress and impairment scale: Introduction of the measure and first findings on pro-environmental behavior
Source: Research Square preprint supplement (doi:10.21203/rs.3.rs-1986606/v1), 2022-08-26
Supplement: Supplementary file 7 [file 85ff895f9073c426ab25ceb0.xlsx]

## Sheet: Table S19
	impg1	impg2	impg3	impg7_r	impg8_r	impg10_r	imps3	impw2
impg1	1	0.55	0.62	0.41	0.34	0.31	0.56	0.56
impg2	0.55	1	0.64	0.42	0.31	0.37	0.62	0.61
impg3	0.62	0.64	1	0.43	0.33	0.45	0.68	0.65
impg7_r	0.41	0.42	0.43	1	0.6	0.52	0.39	0.38
impg8_r	0.34	0.31	0.33	0.6	1	0.47	0.28	0.32
impg10_r	0.31	0.37	0.45	0.52	0.47	1	0.4	0.37
imps3	0.56	0.62	0.68	0.39	0.28	0.4	1	0.59
impw2	0.56	0.61	0.65	0.38	0.32	0.37	0.59	1
