# Supplementary material for: The climate change distress and impairment scale: Introduction of the measure and first findings on pro-environmental behavior
Source: Research Square preprint supplement (doi:10.21203/rs.3.rs-1986606/v1), 2022-08-26
Supplement: Supplementary file 8 [file 99eb0d12c1c2d67b7943f576.xlsx]

## Sheet: Table S23
	dis1	dis2	dis3_r	dis4	dis5_r	dis6	dis7_r	dis8	dis9	dis10_r	dis11	dis12	dis13_r	dis14	dis15_r
dis1	1	0.82	0.31	0.84	0.39	0.73	0.3	0.7	0.67	0.27	0.68	0.67	0.27	0.74	0.68
dis2	0.82	1	0.34	0.77	0.46	0.78	0.32	0.77	0.71	0.33	0.71	0.71	0.28	0.79	0.73
dis3_r	0.31	0.34	1	0.28	0.2	0.29	0.27	0.27	0.29	0.17	0.29	0.31	0.29	0.3	0.4
dis4	0.84	0.77	0.28	1	0.37	0.68	0.29	0.67	0.68	0.26	0.66	0.69	0.31	0.74	0.67
dis5_r	0.39	0.46	0.2	0.37	1	0.41	0.16	0.45	0.35	0.17	0.39	0.41	0.25	0.43	0.45
dis6	0.73	0.78	0.29	0.68	0.41	1	0.26	0.74	0.7	0.28	0.7	0.66	0.25	0.77	0.7
dis7_r	0.3	0.32	0.27	0.29	0.16	0.26	1	0.24	0.32	0.23	0.31	0.34	0.29	0.33	0.34
dis8	0.7	0.77	0.27	0.67	0.45	0.74	0.24	1	0.66	0.28	0.72	0.65	0.29	0.76	0.68
dis9	0.67	0.71	0.29	0.68	0.35	0.7	0.32	0.66	1	0.35	0.69	0.76	0.28	0.77	0.72
dis10_r	0.27	0.33	0.17	0.26	0.17	0.28	0.23	0.28	0.35	1	0.24	0.3	0.22	0.32	0.36
dis11	0.68	0.71	0.29	0.66	0.39	0.7	0.31	0.72	0.69	0.24	1	0.64	0.24	0.73	0.65
dis12	0.67	0.71	0.31	0.69	0.41	0.66	0.34	0.65	0.76	0.3	0.64	1	0.31	0.78	0.72
dis13_r	0.27	0.28	0.29	0.31	0.25	0.25	0.29	0.29	0.28	0.22	0.24	0.31	1	0.28	0.34
dis14	0.74	0.79	0.3	0.74	0.43	0.77	0.33	0.76	0.77	0.32	0.73	0.78	0.28	1	0.76
dis15_r	0.68	0.73	0.4	0.67	0.45	0.7	0.34	0.68	0.72	0.36	0.65	0.72	0.34	0.76	1
