# Supplementary material for: The climate change distress and impairment scale: Introduction of the measure and first findings on pro-environmental behavior
Source: Research Square preprint supplement (doi:10.21203/rs.3.rs-1986606/v1), 2022-08-26
Supplement: Supplementary file 9 [file cb4c0cfb5e08418880cf3be4.xlsx]

## Sheet: Table S24
	imp1	imp2_r	imp3	imp4	imp5_r	imp6_r	imp7	imp8
imp1	1	0.32	0.56	0.59	0.3	0.26	0.3	0.4
imp2_r	0.32	1	0.43	0.4	0.47	0.33	0.11	0.28
imp3	0.56	0.43	1	0.57	0.39	0.32	0.21	0.33
imp4	0.59	0.4	0.57	1	0.31	0.24	0.38	0.55
imp5_r	0.3	0.47	0.39	0.31	1	0.4	0.09	0.29
imp6_r	0.26	0.33	0.32	0.24	0.4	1	0.05	0.11
imp7	0.3	0.11	0.21	0.38	0.09	0.05	1	0.5
imp8	0.4	0.28	0.33	0.55	0.29	0.11	0.5	1
