# Supplementary material for: The climate change distress and impairment scale: Introduction of the measure and first findings on pro-environmental behavior
Source: Research Square preprint supplement (doi:10.21203/rs.3.rs-1986606/v1), 2022-08-26
Supplement: Supplementary file 10 [file d008a8e34ca022b6192359bb.xlsx]

## Sheet: Table S15
	impg1	impg2	impg3	impg6_r	impg7_r	impg8_r	impg10_r	imps1	imps3	imps4_r	imps5_r	impw1	impw2	impw3_r	impw4_r
impg1	1	0.68	0.7	0.46	0.44	0.4	0.45	0.46	0.47	0.25	0.21	0.61	0.65	0.38	0.47
impg2	0.68	1	0.65	0.43	0.43	0.37	0.47	0.42	0.45	0.21	0.25	0.56	0.52	0.38	0.43
impg3	0.7	0.65	1	0.5	0.49	0.41	0.53	0.52	0.49	0.24	0.23	0.64	0.66	0.36	0.42
impg6_r	0.46	0.43	0.5	1	0.57	0.64	0.55	0.37	0.33	0.29	0.34	0.43	0.41	0.37	0.43
impg7_r	0.44	0.43	0.49	0.57	1	0.6	0.65	0.38	0.34	0.33	0.3	0.47	0.39	0.43	0.5
impg8_r	0.4	0.37	0.41	0.64	0.6	1	0.46	0.33	0.31	0.24	0.29	0.38	0.34	0.35	0.41
impg10_r	0.45	0.47	0.53	0.55	0.65	0.46	1	0.31	0.3	0.31	0.36	0.39	0.41	0.42	0.47
imps1	0.46	0.42	0.52	0.37	0.38	0.33	0.31	1	0.64	0.21	0.24	0.41	0.39	0.16	0.2
imps3	0.47	0.45	0.49	0.33	0.34	0.31	0.3	0.64	1	0.21	0.31	0.54	0.46	0.29	0.28
imps4_r	0.25	0.21	0.24	0.29	0.33	0.24	0.31	0.21	0.21	1	0.48	0.25	0.29	0.25	0.28
imps5_r	0.21	0.25	0.23	0.34	0.3	0.29	0.36	0.24	0.31	0.48	1	0.24	0.19	0.34	0.36
impw1	0.61	0.56	0.64	0.43	0.47	0.38	0.39	0.41	0.54	0.25	0.24	1	0.66	0.35	0.38
impw2	0.65	0.52	0.66	0.41	0.39	0.34	0.41	0.39	0.46	0.29	0.19	0.66	1	0.36	0.42
impw3_r	0.38	0.38	0.36	0.37	0.43	0.35	0.42	0.16	0.29	0.25	0.34	0.35	0.36	1	0.71
impw4_r	0.47	0.43	0.42	0.43	0.5	0.41	0.47	0.2	0.28	0.28	0.36	0.38	0.42	0.71	1
