# Supplementary material for: The climate change distress and impairment scale: Introduction of the measure and first findings on pro-environmental behavior
Source: Research Square preprint supplement (doi:10.21203/rs.3.rs-1986606/v1), 2022-08-26
Supplement: Supplementary file 11 [file d2d3869b4db4fcca717dedd2.xlsx]

## Sheet: Table S6
	anx1	anx2	anx3	anx4	anx5	anx6	anx7	anx8	anx9_r	anx10_r	anx11_r	anx12_r	anx13_r	anx14_r	anx15_r	anx16_r
anx1	1	0.5	0.27	0.25	0.19	0.33	0.5	0.42	0.39	0.45	0.12	0.24	0.41	0.56	0.12	0.35
anx2	0.5	1	0.24	0.43	0.29	0.33	0.51	0.47	0.44	0.55	0.33	0.13	0.53	0.53	0.11	0.33
anx3	0.27	0.24	1	0.33	0.18	0.32	0.34	0.3	0.21	0.22	0.05	0.34	0.12	0.33	0.37	0.13
anx4	0.25	0.43	0.33	1	0.29	0.36	0.43	0.38	0.2	0.38	0.33	0.07	0.38	0.39	0.18	0.45
anx5	0.19	0.29	0.18	0.29	1	0.35	0.34	0.4	0.17	0.3	0.29	0.02	0.3	0.27	0.14	0.27
anx6	0.33	0.33	0.32	0.36	0.35	1	0.42	0.43	0.2	0.41	0.28	0.13	0.36	0.38	0.22	0.38
anx7	0.5	0.51	0.34	0.43	0.34	0.42	1	0.54	0.35	0.5	0.33	0.2	0.43	0.55	0.21	0.41
anx8	0.42	0.47	0.3	0.38	0.4	0.43	0.54	1	0.29	0.45	0.21	0.12	0.36	0.47	0.16	0.33
anx9_r	0.39	0.44	0.21	0.2	0.17	0.2	0.35	0.29	1	0.44	0.16	0.19	0.38	0.5	0.12	0.27
anx10_r	0.45	0.55	0.22	0.38	0.3	0.41	0.5	0.45	0.44	1	0.33	0.14	0.63	0.59	0.12	0.46
anx11_r	0.12	0.33	0.05	0.33	0.29	0.28	0.33	0.21	0.16	0.33	1	-0.03	0.38	0.31	0.11	0.37
anx12_r	0.24	0.13	0.34	0.07	0.02	0.13	0.2	0.12	0.19	0.14	-0.03	1	0.12	0.23	0.39	0.01
anx13_r	0.41	0.53	0.12	0.38	0.3	0.36	0.43	0.36	0.38	0.63	0.38	0.12	1	0.61	0.14	0.51
anx14_r	0.56	0.53	0.33	0.39	0.27	0.38	0.55	0.47	0.5	0.59	0.31	0.23	0.61	1	0.22	0.4
anx15_r	0.12	0.11	0.37	0.18	0.14	0.22	0.21	0.16	0.12	0.12	0.11	0.39	0.14	0.22	1	0.12
anx16_r	0.35	0.33	0.13	0.45	0.27	0.38	0.41	0.33	0.27	0.46	0.37	0.01	0.51	0.4	0.12	1
