# Supplementary material for: The climate change distress and impairment scale: Introduction of the measure and first findings on pro-environmental behavior
Source: Research Square preprint supplement (doi:10.21203/rs.3.rs-1986606/v1), 2022-08-26
Supplement: Supplementary file 12 [file f51146e0bef5592e28e889f2.xlsx]

## Sheet: Table S7
	guilt1	guilt2	guilt3	guilt4	guilt5	guilt6	guilt7	guilt8	guilt9_r	guilt10_r	guilt11_r	guilt12_r	guilt13_r	guilt14_r	guilt15_r	guilt16_r
guilt1	1	0.17	0.5	0.3	0.33	0.22	0.36	0.24	0.12	0.3	0.28	0.12	0.35	0.16	0.35	0.22
guilt2	0.17	1	0.27	0.27	0.16	0.29	0.19	0.13	-0.05	0.01	0.03	0.18	0	0.28	0.11	0.33
guilt3	0.5	0.27	1	0.37	0.38	0.22	0.34	0.24	0.1	0.5	0.33	0.21	0.4	0.18	0.48	0.22
guilt4	0.3	0.27	0.37	1	0.47	0.36	0.4	0.36	0.12	0.09	-0.01	0.35	0.05	0.3	0.18	0.3
guilt5	0.33	0.16	0.38	0.47	1	0.32	0.38	0.32	0.23	0.16	0.11	0.47	0.18	0.23	0.34	0.4
guilt6	0.22	0.29	0.22	0.36	0.32	1	0.23	0.21	0.09	0	-0.07	0.23	-0.12	0.36	0.07	0.41
guilt7	0.36	0.19	0.34	0.4	0.38	0.23	1	0.3	0.09	0.11	0.15	0.3	0.1	0.32	0.27	0.24
guilt8	0.24	0.13	0.24	0.36	0.32	0.21	0.3	1	0.03	0.04	0.02	0.19	0.05	0.16	0.12	0.2
guilt9_r	0.12	-0.05	0.1	0.12	0.23	0.09	0.09	0.03	1	0.23	0.12	0.14	0.11	0.03	0.2	0.1
guilt10_r	0.3	0.01	0.5	0.09	0.16	0	0.11	0.04	0.23	1	0.37	0	0.46	-0.01	0.45	-0.03
guilt11_r	0.28	0.03	0.33	-0.01	0.11	-0.07	0.15	0.02	0.12	0.37	1	-0.09	0.46	-0.13	0.31	-0.02
guilt12_r	0.12	0.18	0.21	0.35	0.47	0.23	0.3	0.19	0.14	0	-0.09	1	-0.01	0.37	0.16	0.47
guilt13_r	0.35	0	0.4	0.05	0.18	-0.12	0.1	0.05	0.11	0.46	0.46	-0.01	1	-0.11	0.47	-0.05
guilt14_r	0.16	0.28	0.18	0.3	0.23	0.36	0.32	0.16	0.03	-0.01	-0.13	0.37	-0.11	1	0.14	0.43
guilt15_r	0.35	0.11	0.48	0.18	0.34	0.07	0.27	0.12	0.2	0.45	0.31	0.16	0.47	0.14	1	0.17
guilt16_r	0.22	0.33	0.22	0.3	0.4	0.41	0.24	0.2	0.1	-0.03	-0.02	0.47	-0.05	0.43	0.17	1
