# Supplementary material for: The climate change distress and impairment scale: Introduction of the measure and first findings on pro-environmental behavior
Source: Research Square preprint supplement (doi:10.21203/rs.3.rs-1986606/v1), 2022-08-26
Supplement: Supplementary file [file 1e713b5c3f1158763736fca0.pdf]

**Table S12**

*Study 2 EFA factor loading matrix for the five factor solution.*

|                | Factor 1 | Factor 2 | Factor 3 | Factor 4 | Factor 5 |
|----------------|----------|----------|----------|----------|----------|
| SS loadings    | 12.24    | 7.35     | 5.46     | 3.46     | 2.21     |
| Proportion Var | .18      | .11      | .08      | .05      | .03      |
| Cumulative Var | .18      | .29      | .37      | .43      | .46      |

*Note.* Test of the hypothesis that 5 factors are sufficient. The chi square statistic is 4009.23 on 1886 degrees of freedom,  $p = 7.22e-155$ . SS loadings = sum of squared loadings; Proportion Var = proportion variance explained; Cumulative Var = cumulative variance explained.

**Table S12***Study 2 EFA factor loading matrix for the five factor solution.*

| Items   | Factor 1 | Factor 2 | Factor 3 | Factor 4 | Factor 5 |
|---------|----------|----------|----------|----------|----------|
| ang1    | .47      |          |          |          |          |
| ang2    | .48      |          |          |          |          |
| ang3    | .71      |          |          |          |          |
| ang4    | .49      |          |          |          |          |
| ang5    | .70      |          |          |          |          |
| ang6    | .60      |          |          |          |          |
| ang7    | .45      |          |          |          |          |
| ang8    | .76      |          |          |          |          |
| ang9_r  | .55      |          |          |          |          |
| ang10_r | .54      |          | .36      |          |          |
| ang11_r |          |          | .40      |          |          |
| ang12_r | .39      |          | .49      |          |          |
| ang13_r | .44      |          | .38      |          |          |
| ang15_r | .53      |          | .50      |          |          |
| ang16_r | .42      |          |          |          | .56      |
| anx2    | .67      |          |          |          |          |
| anx3    | .35      |          |          |          |          |
| anx4    | .63      |          |          |          |          |
| anx5    | .48      |          |          |          |          |
| anx6    | .67      |          |          |          |          |
| anx7    | .65      |          |          |          |          |
| anx8    | .55      |          |          |          |          |
| anx9_r  | .42      |          | .37      |          |          |
| anx10_r | .51      |          | .44      |          |          |
| anx13_r | .55      |          | .36      |          |          |
| anx14_r | .60      |          | .43      |          |          |
| anx16_r | .45      |          |          |          | .51      |
| ang1    | .47      |          |          |          |          |
| ang2    | .48      |          |          |          |          |
| ang3    | .71      |          |          |          |          |
| ang4    | .49      |          |          |          |          |

*Note.* Table is continued on the next page for items assessing sadness and guilt.

**Table S12 Continued***Study 2 EFA factor loading matrix for the five factor solution.*

| Items     | Factor 1 | Factor 2 | Factor 3 | Factor 4 | Factor 5 |
|-----------|----------|----------|----------|----------|----------|
| sad1      | .60      |          |          |          |          |
| sad2      | .48      | .50      |          |          |          |
| sad3      | .55      |          |          |          |          |
| sad4      | .55      |          |          |          |          |
| sad5      | .64      |          |          |          |          |
| sad6      | .70      |          |          |          |          |
| sad7      | .67      |          |          |          |          |
| sad8      | .59      |          |          |          |          |
| sad13_r   | .37      |          |          |          | .45      |
| sad14_r   |          |          |          |          | .45      |
| sad16_r   | .59      |          | .40      |          |          |
| guilt5    |          |          |          | .61      |          |
| guilt6    |          |          | .38      |          |          |
| guilt7    |          |          |          | .42      |          |
| guilt17_r |          |          | .49      | .36      |          |
| guilt18_r |          |          | .57      | .39      |          |
| guilt19   |          |          |          | .64      |          |
| guilt20_r |          |          | .65      |          |          |
| guilt21_r |          |          | .62      |          |          |
| guilt22   |          |          |          | .60      |          |
| guilt23_r |          |          | .62      |          |          |
| guilt24   |          |          |          | .54      |          |
| guilt25_r |          |          | .60      |          |          |
| guilt26_r |          |          | .57      |          |          |
| guilt27   |          |          |          | .56      |          |

*Note.* Table is continued on the next page for items assessing impairment.

**Table S12 Continued***Study 2 EFA factor loading matrix for the five factor solution.*

| Items    | Factor 1 | Factor 2 | Factor 3 | Factor 4 | Factor 5 |
|----------|----------|----------|----------|----------|----------|
| impg1    |          | .76      |          |          |          |
| impg2    |          | .72      |          |          |          |
| impg3    |          | .78      |          |          |          |
| impg6_r  |          | .66      |          |          |          |
| impg7_r  |          | .68      |          |          |          |
| impg8_r  |          | .57      |          |          |          |
| impg10_r |          | .67      |          |          |          |
| imps1    |          | .50      |          |          |          |
| imps3    |          | .57      |          |          |          |
| imps4_r  |          | .36      |          |          |          |
| imps5_r  |          | .41      |          |          |          |
| impw1    |          | .71      |          |          |          |
| impw2    |          | .69      |          |          |          |
| impw3_r  |          | .61      |          |          |          |
| impw4_r  |          | .68      |          |          |          |
