# Supplementary material for: The climate change distress and impairment scale: Introduction of the measure and first findings on pro-environmental behavior
Source: Research Square preprint supplement (doi:10.21203/rs.3.rs-1986606/v1), 2022-08-26
Supplement: Supplementary file [file 1f7c1452d832966f3bb35a0d.pdf]

**Table S1**

*Study 1 list of administered items (initial item pool, 84 items)*

---

**Anger**

---

Unsustainable behavior bothers me.

I am not mad when others damage the climate.

I do not judge others for their environmental behavior.

I do not care about others wasting energy.

It is okay that some people are not interested in climate change.

I feel good about the steps that have already been taken to address climate change.

I do not get upset when others ignore climate change.

I am calm because I think that enough is being done about climate change.

I resent others for not behaving pro-environmentally.

It makes me furious when others deny climate change.

I get upset when others behave unsustainably.

I am enraged that we have missed many chances to stop climate change.

I want companies who destroy the climate to be punished.

I feel aggressive towards people who destroy the environment.

I feel angry when I see how little is done to combat climate change.

I am not angry that some countries have missed their climate protection goals.

---

*Note.* Table is continued on the next page.

**Table S1 Continued**

*Study 1 list of administered items (initial item pool, 84 items)*

---

Anxiety

---

I feel tense when I think about climate change.

I do not worry about the effects of climate change.

I find climate change harmless.

Despite climate change, I look positively toward the future.

I am not worried about climate change.

Climate change does not scare me.

I believe that we will get climate change under control.

I feel carefree when I think about climate change.

When I think about climate change, I worry about the future.

I fear that we cannot stop climate change.

I fear that some resources will become scarce because of climate change.

I fear that political conflicts will increase due to climate change.

I fear that more animal species will go extinct.

The uncertainty about how climate change will progress scares me.

I am scared that people will lose their homes because of climate change.

I do not fear for my future on this planet.

---

*Note.* Table is continued on the next page.

## Table S1 Continued

*Study 1 list of administered items (initial item pool, 84 items)*

---

### Guilt

---

I am ashamed that I do not behave more sustainably.

I do enough to counteract climate change.

I am proud of my environmentally conscious behavior.

I am not responsible for stopping climate change.

I am happy with my contribution to climate protection.

I am comfortable not making sacrifices for climate protection.

My commitment to climate protection is sufficient.

Climate change is not my problem.

Humanity is destroying the planet with its self-interest.

I feel that I am not doing enough to stop climate change.

Sometimes I think about how my actions have harmed the climate.

I think climate change is my fault too.

I feel bad when I waste energy.

When I see news about climate change, I feel complicit.

I am embarrassed that I used to take climate change less seriously than I do now.

Others are to blame for climate change.

---

*Note.* Table is continued on the next page.

## Table S1 Continued

*Study 1 list of administered items (initial item pool, 84 items)*

---

### Sadness

---

News about climate change makes me feel depressed.

The extinction of animal species does not make me feel sad.

I am not concerned about climate change.

I find forecasts about climate change amusing.

I feel happy when I think about the current state of the environment.

I am happy about the changes that climate change brings about.

I am not troubled by news about the consequences of climate change.

I am not sad about climate change.

Thinking about climate change makes me want to cry.

I feel sad when someone mentions climate change.

Climate change makes me feel hopeless.

I feel sad that climate change is causing people and animals to suffer.

I feel sad that some parts of the environment will not recover from the effects of  
climate change.

The impact that climate change has had on the planet saddens me.

I feel miserable when I think about climate change.

---

*Note.* Table is continued on the next page.

## Table S1 Continued

*Study 1 list of administered items (initial item pool, 84 items)*

---

### Impairment

---

Climate change drains all my energy.

My thoughts and feelings about climate change do not affect how well I sleep.

When I think about climate change, I get a headache or stomachache.

Because of climate change, I am overwhelmed by everyday activities.

When I think about climate change I do not feel like doing anything.

I have given up hobbies because they are bad for the climate.

Climate change does not keep me from enjoying my life.

My thoughts and feelings about climate change do not negatively impact my  
everyday life.

I have no trouble mentally tuning out climate change.

I can easily balance my commitment to climate protection with my everyday life.

I fight with family and friends because they see climate change differently than I do.

I have lost friends because we had different opinions on climate change

Constant discussions about climate change are affecting my relationships.

I have never broken ties with anyone because of a differing opinion on climate  
change.

I do not feel excluded by others because of my views on climate change.

It is easy for me to find friends who see climate change the way I do.

---
