# Supplementary material for: The climate change distress and impairment scale: Introduction of the measure and first findings on pro-environmental behavior
Source: Research Square preprint supplement (doi:10.21203/rs.3.rs-1986606/v1), 2022-08-26
Supplement: Supplementary file [file 5de13ebc0d0e57a89e89cf5a.pdf]

**Table S16**

*Study 2 EFA factor loading matrix for the two factor solution (reduced item set).*

|                | Factor 1 | Factor 2 |
|----------------|----------|----------|
| SS loadings    | 10.18    | 6.32     |
| Proportion Var | .28      | .18      |
| Cumulative Var | .28      | .46      |

*Note.* Test of the hypothesis that two factors are sufficient. The chi square is 2141.78 on 559 degrees of freedom,  $p = 1.9\text{e-}183$ . SS loadings = sum of squared loadings; Proportion Var = proportion variance explained; Cumulative Var = cumulative variance explained.

**Table S16***Study 2 EFA factor loading matrix for the two factor solution (reduced item set).*

| Item    | Factor 1 | Factor 2 |
|---------|----------|----------|
| ang3    | .70      |          |
| ang5    | .68      |          |
| ang8    | .74      |          |
| ang9_r  | .60      |          |
| ang10_r | .59      |          |
| ang13_r | .55      |          |
| ang15_r | .66      |          |
| anx2    | .73      |          |
| anx4    | .64      |          |
| anx6    | .69      |          |
| anx7    | .70      |          |
| anx8    | .58      |          |
| anx9_r  | .56      |          |
| anx10_r | .65      |          |
| anx13_r | .69      |          |
| anx14_r | .76      |          |
| anx16_r | .57      |          |
| sad1    | .63      |          |
| sad3    | .56      |          |
| sad5    | .67      |          |
| sad6    | .68      |          |
| sad7    | .68      |          |
| sad16_r | .75      |          |
| imp1    |          | .79      |
| imp2    |          | .74      |
| imp3    |          | .82      |
| imp6_r  |          | .65      |
| imp7_r  |          | .65      |
| imp8_r  |          | .56      |
| imp10_r |          | .65      |
| imps1   |          | .56      |
| imps3   |          | .61      |
| impw1   |          | .74      |
| impw2   |          | .72      |
| impw3_r |          | .55      |
| impw4_r |          | .62      |
