# Supplementary material for: The climate change distress and impairment scale: Introduction of the measure and first findings on pro-environmental behavior
Source: Research Square preprint supplement (doi:10.21203/rs.3.rs-1986606/v1), 2022-08-26
Supplement: Supplementary file [file 8c5f346ff37131f1266a0cee.pdf]

**Table S20***Study 3 CFA results for latent variables.*

|                   | <i>Est</i> | <i>SE</i> | <i>z</i> | <i>p(&gt; z )</i> |
|-------------------|------------|-----------|----------|-------------------|
| <b>Distress</b>   |            |           |          |                   |
| ang5              | 0.68       | 0.05      | 12.71    | .000              |
| ang8              | 0.68       | 0.04      | 15.56    | .000              |
| ang9_r            | 0.40       | 0.04      | 8.96     | .000              |
| ang10_r           | 0.36       | 0.04      | 8.57     | .000              |
| ang15_r           | 0.51       | 0.05      | 10.76    | .000              |
| anx2              | 0.73       | 0.05      | 16.19    | .000              |
| anx7              | 0.75       | 0.04      | 18.32    | .000              |
| anx8              | 0.62       | 0.05      | 12.47    | .000              |
| anx9_r            | 0.42       | 0.06      | 7.42     | .000              |
| anx16_r           | 0.44       | 0.05      | 9.56     | .000              |
| sad1              | 0.65       | 0.05      | 13.79    | .000              |
| sad5              | 0.65       | 0.04      | 16.02    | .000              |
| sad6              | 0.67       | 0.04      | 17.69    | .000              |
| sad7              | 0.78       | 0.04      | 19.57    | .000              |
| sad16_r           | 0.47       | 0.04      | 10.50    | .000              |
| <b>Impairment</b> |            |           |          |                   |
| imp1              | 0.77       | 0.05      | 15.76    | .000              |
| imp2              | 0.76       | 0.05      | 71.00    | .000              |
| imp3              | 0.87       | 0.04      | 19.53    | .000              |
| imp7_r            | 0.59       | 0.05      | 12.08    | .000              |
| imp8_r            | 0.46       | 0.05      | 9.30     | .000              |
| imp10_r           | 0.59       | 0.06      | 10.66    | .000              |
| imps3             | 0.75       | 0.04      | 17.52    | .000              |
| impw2             | 0.75       | 0.04      | 17.12    | .000              |

*Note.* Tables is continued on the next page. *Est* = Estimate, *SE* = Standard Error for *z*.

**Table S20 Continued***Study 3 CFA results for latent variables.*

|               | <i>Est</i> | <i>SE</i> | <i>z</i> | <i>p(&gt; z )</i> |
|---------------|------------|-----------|----------|-------------------|
| Method Factor |            |           |          |                   |
| ang9_r        | 0.55       | 0.04      | 13.24    | .000              |
| ang10_r       | 0.48       | 0.04      | 11.98    | .000              |
| ang15_r       | 0.64       | 0.04      | 15.08    | .000              |
| anx9_r        | 0.54       | 0.06      | 9.83     | .000              |
| anx16_r       | 0.49       | 0.04      | 11.17    | .000              |
| sad16_r       | 0.56       | 0.04      | 14.06    | .000              |
| imp7_r        | 0.61       | 0.05      | 12.64    | .000              |
| imp8_r        | 0.61       | 0.05      | 12.05    | .000              |
| imp10_r       | 0.49       | 0.06      | 8.83     | .000              |

*Note.* *Est* = Estimate, *SE* = Standard Error for *z*.

**Table S20***Study 3 CFA results for covariances.*

|               | <i>Est</i> | <i>SE</i> | <i>z</i> | <i>p(&gt; z )</i> |
|---------------|------------|-----------|----------|-------------------|
| Distress      |            |           |          |                   |
| Impairment    | 0.19       | 0.06      | 3.48     | .001              |
| Method Factor | -0.13      | 0.07      | -1.80    | .072              |
| Impairment    |            |           |          |                   |
| Method Factor | -0.01      | 0.06      | -0.11    | .913              |

*Note.* *Est* = Estimate, *SE* = Standard Error for *z*.

**Table S20***Study 3 CFA results for variances.*

|               | <i>Est</i> | <i>SE</i> | <i>z</i> | <i>p(&gt; z )</i> |
|---------------|------------|-----------|----------|-------------------|
| Distress      | 1.00       |           |          |                   |
| Impairment    | 1.00       |           |          |                   |
| Method Factor | 1.00       |           |          |                   |
| ang5          | 0.77       | 0.06      | 12.98    | .000              |
| ang8          | 0.44       | 0.04      | 12.46    | .000              |
| ang9_r        | 0.37       | 0.03      | 11.79    | .000              |
| ang10_r       | 0.37       | 0.03      | 12.23    | .000              |
| ang15_r       | 0.34       | 0.03      | 10.80    | .000              |
| anx2          | 0.45       | 0.04      | 12.31    | .000              |
| anx7          | 0.31       | 0.03      | 11.59    | .000              |
| anx8          | 0.67       | 0.05      | 13.02    | .000              |
| anx9_r        | 0.78       | 0.06      | 12.79    | .000              |
| anx16_r       | 0.46       | 0.04      | 12.42    | .000              |
| sad1          | 0.56       | 0.04      | 12.82    | .000              |
| sad5          | 0.37       | 0.03      | 12.35    | .000              |
| sad6          | 0.29       | 0.02      | 11.84    | .000              |
| sad7          | 0.26       | 0.02      | 10.96    | .000              |
| sad16_r       | 0.33       | 0.03      | 11.35    | .000              |
| impg1         | 0.54       | 0.05      | 12.03    | .000              |
| impg2         | 0.41       | 0.04      | 11.48    | .000              |
| impg3         | 0.31       | 0.03      | 9.92     | .000              |
| impg7_r       | 0.51       | 0.05      | 11.27    | .000              |
| impg8_r       | 0.60       | 0.05      | 11.84    | .000              |
| impg10_r      | 0.80       | 0.06      | 12.51    | .000              |
| imps3         | 0.36       | 0.03      | 11.23    | .000              |
| impw2         | 0.38       | 0.03      | 11.43    | .000              |

*Note.* *Est* = Estimate, *SE* = Standard Error for *z*.
