# Supplementary material for: The climate change distress and impairment scale: Introduction of the measure and first findings on pro-environmental behavior
Source: Research Square preprint supplement (doi:10.21203/rs.3.rs-1986606/v1), 2022-08-26
Supplement: Supplementary file [file 44dac246aaac330f6da7ed8a.pdf]

**Table S17***Study 2 CFA results for latent variables.*

|            | <i>Est</i> | <i>SE</i> | <i>z</i> | <i>p(&gt; z )</i> |
|------------|------------|-----------|----------|-------------------|
| Distress   |            |           |          |                   |
| ang5       | 0.84       | 0.05      | 17.91    | .000              |
| ang8       | 0.81       | 0.04      | 19.75    | .000              |
| ang9_r     | 0.54       | 0.04      | 12.41    | .000              |
| ang10_r    | 0.43       | 0.04      | 11.55    | .000              |
| ang15_r    | 0.55       | 0.04      | 12.82    | .000              |
| anx2       | 0.69       | 0.04      | 17.70    | .000              |
| anx7       | 0.67       | 0.04      | 17.25    | .000              |
| anx8       | 0.62       | 0.05      | 13.65    | .000              |
| anx9_r     | 0.55       | 0.05      | 10.91    | .000              |
| anx16_r    | 0.44       | 0.04      | 10.33    | .000              |
| sad1       | 0.71       | 0.04      | 16.01    | .000              |
| sad5       | 0.52       | 0.03      | 15.67    | .000              |
| sad6       | 0.57       | 0.04      | 16.12    | .000              |
| sad7       | 0.59       | 0.04      | 15.56    | .000              |
| sad16_r    | 0.57       | 0.04      | 15.69    | .000              |
| Impairment |            |           |          |                   |
| imp1       | 0.80       | 0.04      | 20.78    | .000              |
| imp2       | 0.77       | 0.04      | 18.53    | .000              |
| imp3       | 0.79       | 0.04      | 21.85    | .000              |
| imp7_r     | 0.68       | 0.05      | 12.49    | .000              |
| imp8_r     | 0.62       | 0.06      | 10.67    | .000              |
| imp10_r    | 0.70       | 0.05      | 13.20    | .000              |
| imps3      | 0.51       | 0.04      | 12.69    | .000              |
| impw2      | 0.67       | 0.04      | 18.05    | .000              |

*Note.* Table is continued on the next page. *Est* = Estimate, *SE* = Standard Error for *z*.

**Table S17 Continued***Study 2 CFA results for latent variables.*

|               | <i>Est</i> | <i>SE</i> | <i>z</i> | <i>p(&gt; z )</i> |
|---------------|------------|-----------|----------|-------------------|
| Method Factor |            |           |          |                   |
| ang9_r        | 0.24       | 0.05      | 5.29     | .000              |
| ang10_r       | 0.21       | 0.04      | 5.50     | .000              |
| ang15_r       | 0.38       | 0.04      | 8.64     | .000              |
| anx9_r        | 0.31       | 0.05      | 5.77     | .000              |
| anx16_r       | 0.24       | 0.05      | 5.23     | .000              |
| sad16_r       | 0.29       | 0.04      | 8.09     | .000              |
| imp7_r        | 0.59       | 0.05      | 12.35    | .000              |
| imp8_r        | 0.59       | 0.05      | 11.06    | .000              |
| imp10_r       | 0.44       | 0.05      | 8.89     | .000              |

*Note.* *Est* = Estimate, *SE* = Standard Error for *z*.

**Table S17***Study 2 CFA results for covariances.*

|               | <i>Est</i> | <i>SE</i> | <i>z</i> | <i>p(&gt; z )</i> |
|---------------|------------|-----------|----------|-------------------|
| Distress      |            |           |          |                   |
| Impairment    | 0.29       | 0.05      | 5.87     | .000              |
| Method Factor | 0.09       | 0.07      | 1.23     | .219              |
| Impairment    |            |           |          |                   |
| Method Factor | -0.12      | 0.08      | -1.57    | .117              |

*Note.* *Est* = Estimate, *SE* = Standard Error for *z*.

**Table S17***Study 2 CFA results for variances.*

|               | <i>Est</i> | <i>SE</i> | <i>z</i> | <i>p(&gt; z )</i> |
|---------------|------------|-----------|----------|-------------------|
| Distress      | 1.00       |           |          |                   |
| Impairment    | 1.00       |           |          |                   |
| Method Factor | 1.00       |           |          |                   |
| ang5          | 0.57       | 0.04      | 13.38    | .000              |
| ang8          | 0.38       | 0.03      | 12.76    | .000              |
| ang9_r        | 0.56       | 0.04      | 14.01    | .000              |
| ang10_r       | 0.42       | 0.03      | 14.04    | .000              |
| ang15_r       | 0.46       | 0.04      | 12.79    | .000              |
| anx2          | 0.40       | 0.03      | 13.44    | .000              |
| anx7          | 0.40       | 0.03      | 13.55    | .000              |
| anx8          | 0.67       | 0.05      | 14.22    | .000              |
| anx9_r        | 0.80       | 0.06      | 14.01    | .000              |
| anx16_r       | 0.59       | 0.04      | 14.17    | .000              |
| sad1          | 0.57       | 0.04      | 13.83    | .000              |
| sad5          | 0.33       | 0.02      | 13.90    | .000              |
| sad6          | 0.36       | 0.03      | 13.81    | .000              |
| sad7          | 0.43       | 0.03      | 13.92    | .000              |
| sad16_r       | 0.30       | 0.02      | 12.67    | .000              |

*Note.* Table is continued on the next page for items assessing impairment. *Est* = Estimate,

*SE* = Standard Error for *z*.

**Table S17 Continued***Study 2 CFA results for variances.*

|          | <i>Est</i> | <i>SE</i> | <i>z</i> | <i>p(&gt; z )</i> |
|----------|------------|-----------|----------|-------------------|
| impg1    | 0.29       | 0.03      | 11.33    | .000              |
| impg2    | 0.41       | 0.03      | 12.62    | .000              |
| impg3    | 0.23       | 0.02      | 10.43    | .000              |
| impg7_r  | 0.41       | 0.04      | 9.74     | .000              |
| impg8_r  | 0.62       | 0.05      | 11.45    | .000              |
| impg10_r | 0.59       | 0.05      | 12.67    | .000              |
| imps3    | 0.54       | 0.04      | 14.16    | .000              |
| impw2    | 0.34       | 0.03      | 12.82    | .000              |

*Note.* *Est* = Estimate, *SE* = Standard Error for *z*.
