# Supplementary material for: The climate change distress and impairment scale: Introduction of the measure and first findings on pro-environmental behavior
Source: Research Square preprint supplement (doi:10.21203/rs.3.rs-1986606/v1), 2022-08-26
Supplement: Supplementary file [file 1797d0d78592fa79d68b0946.pdf]

**Table S11**

*Study 2 list of administered items (including new set of guilt items).*

---

**Anger**

---

- 
- I feel angry when I see how little is done to combat climate change.
  - I am not angry that some countries have missed their climate protection goals.
  - I do not care about others wasting energy.
  - I do not judge others for their environmental behavior.
  - I resent others for not behaving pro-environmentally.
  - I am not mad when others damage the climate.
  - It is okay that some people are not interested in climate change.
  - I get upset when others behave unsustainably.
  - I am calm because I think that enough is being done about climate change.
  - I feel aggressive towards people who destroy the environment.
  - It makes me furious when others deny climate change.
  - I am enraged that we have missed many chances to stop climate change.
  - I want companies who destroy the climate to be punished.
  - Unsustainable behavior bothers me.
  - I do not get upset when others ignore climate change.
- 

*Note.* Table is continued on the next page.

**Table S11 Continued**

*Study 2 list of administered items (including new set of guilt items).*

---

Anxiety

---

I fear that some resources will become scarce because of climate change.

I do not worry about the effects of climate change.

I am not worried about climate change.

I feel carefree when I think about climate change.

When I think about climate change, I worry about the future.

I fear that we cannot stop climate change.

I fear that political conflicts will increase due to climate change.

The uncertainty about how climate change will progress scares me.

I fear that more animal species will go extinct.

I am scared that people will lose their homes because of climate change.

I do not fear for my future on this planet.

Climate change does not scare me.

---

*Note.* Table is continued on the next page.

**Table S11 Continued**

*Study 2 list of administered items (including new set of guilt items).*

---

Guilt

---

When I see news about climate change, I feel complicit.

I do not feel guilty about having hobbies that harm the climate.

I do not feel guilty about putting my own needs before climate protection.

I do not feel guilty when I use a lot of water.

I am not to blame for the state of the environment.

I am not to blame for the consequences of climate change.

I feel bad when I waste energy.

I think climate change is my fault too.

I feel guilty because I do not do enough to educate myself about climate change.

I feel guilty because I produce more greenhouse gases than I need to.

I feel guilty because I could do more to save natural resources.

I feel guilty because the lifestyle I want is not sustainable.

I do not feel guilty about producing waste

I do not feel guilty about using up a lot of resources.

---

*Note.* Table is continued on the next page.

**Table S11 Continued**

*Study 2 list of administered items (including new set of guilt items).*

---

Sadness

---

News about climate change makes me feel depressed.

I am not sad about climate change.

I am happy about the changes that climate change brings about.

Thinking about climate change makes me want to cry.

I feel sad when someone mentions climate change.

Climate change makes me feel hopeless.

I feel sad that climate change is causing people and animals to suffer.

I feel sad that some parts of the environment will not recover from the effects of  
climate change.

The impact that climate change has had on the planet saddens me.

I feel miserable when I think about climate change.

---

*Note.* Table is continued on the next page.

**Table S11 Continued**

*Study 2 list of administered items (including new set of guilt items).*

---

Impairment

---

Climate change drains all my energy.

When I think about climate change, I get a headache or stomachache.

Because of climate change, I am overwhelmed by everyday activities.

My thoughts and feelings about climate change do not affect how well I sleep.

My thoughts and feelings about climate change do not negatively impact my  
everyday life.

I have no trouble mentally tuning out climate change.

Climate change does not keep me from enjoying my life.

I fight with family and friends because they see climate change differently than I do.

Constant discussions about climate change are affecting my relationships.

I have never broken ties with anyone because of a differing opinion on climate  
change.

I do not feel excluded by others because of my views on climate change.

When I think about climate change, I cannot bring myself to work/study.

I frequently think about climate change instead of working/studying.

Even when I think about climate change, I can easily concentrate at work/in school.

On days on which I worry about climate change, I am as productive as usual.

---
