# Supplementary material for: The climate change distress and impairment scale: Introduction of the measure and first findings on pro-environmental behavior
Source: Research Square preprint supplement (doi:10.21203/rs.3.rs-1986606/v1), 2022-08-26
Supplement: Supplementary file [file 0575598b1134bb15ea2b4d4a.pdf]

**Table S21**

*Study 4 list of administered items (final item set in German language).*

| Reverse Score | Item Type | Item                                                                                                                        |
|---------------|-----------|-----------------------------------------------------------------------------------------------------------------------------|
|               | Anger     | Ich bin wütend, wenn ich sehe, wie wenig gegen den Klimawandel getan wird.                                                  |
| R             | Anxiety   | Wenn ich an den Klimawandel denke, Sorge ich mich um die Zukunft.                                                           |
|               | Sadness   | Ich bin nicht traurig über den Klimawandel.                                                                                 |
|               | Anger     | Ich bin wütend darüber, dass wir viele Chancen verpasst haben, den Klimawandel zu stoppen.                                  |
| R             | Anxiety   | Ich habe keine Angst um meine Zukunft auf diesem Planeten.                                                                  |
|               | Sadness   | Nachrichten über den Klimawandel bedrücken mich.                                                                            |
| R             | Anger     | Ich bin nicht sauer, wenn andere dem Klima schaden.                                                                         |
|               | Anxiety   | Die Ungewissheit darüber, wie der Klimawandel voranschreiten wird, macht mir Angst.                                         |
|               | Sadness   | Ich bin traurig darüber, dass Menschen und Tiere unter dem Klimawandel leiden.                                              |
| R             | Anger     | Ich rege mich nicht auf, wenn andere den Klimawandel ignorieren.                                                            |
|               | Anxiety   | Ich habe Angst davor, dass Menschen durch den Klimawandel ihr zu Hause verlieren.                                           |
|               | Sadness   | Ich bin traurig darüber, dass sich manche Teile der Umwelt nicht mehr von den Auswirkungen des Klimawandels erholen werden. |
| R             | Anger     | Ich bin nicht wütend darüber, dass manche Länder ihre Klimaschutzziele verfehlt haben.                                      |
|               | Sadness   | Die Auswirkungen, die der Klimawandel auf den Planeten hat, machen mich traurig.                                            |
| R             | Anxiety   | Ich fühle mich unbeschwert, wenn ich an den Klimawandel denke.                                                              |

*Note.* Table is continued on the next page for items assessing impairment. Items were administered in the same order as presented here.

**Table S21 Continued**

*Study 4 list of administered items (final item set in German language).*

| Reverse Score | Item Type  | Item                                                                                  |
|---------------|------------|---------------------------------------------------------------------------------------|
|               | Impairment | Der Klimawandel raubt mir alle Energie.                                               |
| R             | Impairment | Meine Gedanken und Gefühle zum Klimawandel beeinflussen nicht, wie gut ich schlafe.   |
|               | Impairment | Wenn ich über den Klimawandel nachdenke, bekomme ich Kopf- oder Bauchschmerzen.       |
|               | Impairment | Wegen des Klimawandels bin ich vom Alltag überfordert.                                |
| R             | Impairment | Meine Gedanken und Gefühle zum Klimawandel beeinträchtigen meinen Alltag nicht.       |
| R             | Impairment | Ich habe keine Schwierigkeiten damit, den Klimawandel gedanklich auszublenden.        |
|               | Impairment | Ständige Diskussionen über den Klimawandel beeinträchtigen meine Beziehungen.         |
|               | Impairment | Wenn ich an den Klimawandel denke, kann ich mich nicht aufraffen, zu arbeiten/lernen. |

*Note.* Items were administered in the same order as presented here.
