# Supplementary material for: The climate change distress and impairment scale: Introduction of the measure and first findings on pro-environmental behavior
Source: Research Square preprint supplement (doi:10.21203/rs.3.rs-1986606/v1), 2022-08-26
Supplement: Supplementary file [file 42218387b03779fe2afba8af.pdf]

**Table S22***Study 4 CFA results for latent variables.*

|                   | <i>Est</i> | <i>SE</i> | <i>z</i> | <i>p(&gt; z )</i> |
|-------------------|------------|-----------|----------|-------------------|
| <b>Distress</b>   |            |           |          |                   |
| dis1              | 1.16       | 0.50      | 23.80    | 0.000             |
| dis2              | 1.17       | 0.05      | 23.68    | 0.000             |
| dis3_r            | 0.53       | 0.06      | 8.49     | 0.000             |
| dis4              | 1.12       | 0.50      | 22.88    | 0.000             |
| dis5_r            | 0.63       | 0.06      | 11.05    | 0.000             |
| dis6              | 1.03       | 0.44      | 23.47    | 0.000             |
| dis7_r            | 0.48       | 0.06      | 8.32     | 0.000             |
| dis8              | 1.05       | 0.05      | 22.83    | 0.000             |
| dis9              | 0.92       | 0.04      | 22.42    | 0.000             |
| dis10_r           | 0.54       | 0.07      | 8.14     | 0.000             |
| dis11             | 0.96       | 0.04      | 21.58    | 0.000             |
| dis12             | 0.92       | 0.41      | 22.12    | 0.000             |
| dis13_r           | 0.50       | 0.06      | 7.77     | 0.000             |
| dis14             | 1.08       | 0.04      | 25.72    | 0.000             |
| dis15_r           | 0.99       | 0.05      | 21.61    | 0.000             |
| <b>Impairment</b> |            |           |          |                   |
| imp1              | 0.70       | 0.04      | 17.60    | 0.000             |
| imp2_r            | 1.33       | 0.28      | 4.81     | 0.000             |
| imp3              | 0.76       | 0.04      | 17.22    | 0.000             |
| imp4              | 0.65       | 0.03      | 20.02    | 0.000             |
| imp5_r            | 1.72       | 0.41      | 4.15     | 0.000             |
| imp6_r            | 1.42       | 0.36      | 3.93     | 0.000             |
| imp7              | 0.36       | 0.40      | 9.28     | 0.000             |
| imp8              | 0.43       | 0.03      | 13.73    | 0.000             |

*Note.* Table is continued on the next page. *Est* = Estimate, *SE* = Standard Error for *z*.

**Table S22***Study 4 CFA results for latent variables.*

|               | <i>Est</i> | <i>SE</i> | <i>z</i> | <i>p(&gt; z )</i> |
|---------------|------------|-----------|----------|-------------------|
| Method Factor |            |           |          |                   |
| dis3_r        | 0.16       | 0.07      | 2.37     | 0.018             |
| dis5_r        | -0.05      | 0.06      | -0.87    | 0.387             |
| dis7_r        | 0.16       | 0.06      | 2.46     | 0.014             |
| dis10_r       | 0.18       | 0.07      | 2.47     | 0.014             |
| dis13_r       | 0.12       | 0.07      | 1.70     | 0.089             |
| dis15_r       | 0.24       | 0.04      | 6.81     | 0.000             |
| imp2_r        | 0.88       | 0.25      | 3.51     | 0.000             |
| imp5_r        | 1.35       | 0.37      | 3.64     | 0.000             |
| imp6_r        | 1.18       | 0.32      | 3.65     | 0.000             |

*Note.* *Est* = Estimate, *SE* = Standard Error for *z*.

**Table S22***Study 4 CFA results for covariances.*

|               | <i>Est</i> | <i>SE</i> | <i>z</i> | <i>p(&gt; z )</i> |
|---------------|------------|-----------|----------|-------------------|
| Distress      |            |           |          |                   |
| Impairment    | 0.40       | 0.04      | 9.18     | .000              |
| Method Factor | -0.19      | 0.09      | -2.10    | .036              |
| Impairment    |            |           |          |                   |
| Method Factor | -0.85      | 0.08      | -10.76   | .000              |

*Note.* *Est* = Estimate, *SE* = Standard Error for *z*.

**Table S22***Study 4 CFA results for variances.*

|               | <i>Est</i> | <i>SE</i> | <i>z</i> | <i>p(&gt; z )</i> |
|---------------|------------|-----------|----------|-------------------|
| Distress      | 1.00       |           |          |                   |
| Impairment    | 1.00       |           |          |                   |
| Method Factor | 1.00       |           |          |                   |
| dis1          | 0.48       | 0.03      | 14.16    | 0.000             |
| dis2          | 0.33       | 0.02      | 13.38    | 0.000             |
| dis3_r        | 1.57       | 0.10      | 15.52    | 0.000             |
| dis4          | 0.54       | 0.04      | 14.42    | 0.000             |
| dis5_r        | 1.30       | 0.08      | 15.52    | 0.000             |
| dis6          | 0.40       | 0.03      | 14.26    | 0.000             |
| dis7_r        | 1.35       | 0.09      | 15.51    | 0.000             |
| dis8          | 0.47       | 0.03      | 14.43    | 0.000             |
| dis9          | 0.40       | 0.03      | 14.52    | 0.000             |
| dis10_r       | 1.75       | 0.11      | 15.52    | 0.000             |
| dis11         | 0.49       | 0.03      | 14.69    | 0.000             |
| dis12         | 0.41       | 0.03      | 14.59    | 0.000             |
| dis13_r       | 1.69       | 0.11      | 15.59    | 0.000             |
| dis14         | 0.28       | 0.02      | 13.36    | 0.000             |
| dis15_r       | 0.34       | 0.03      | 13.08    | 0.000             |
| imp1          | 0.42       | 0.03      | 12.38    | 0.000             |
| imp2_r        | 0.88       | 0.07      | 12.63    | 0.000             |
| imp3          | 0.53       | 0.04      | 12.61    | 0.000             |
| imp4          | 0.23       | 0.02      | 10.41    | 0.000             |
| imp5_r        | 0.88       | 0.09      | 8.71     | 0.000             |
| imp6_r        | 0.99       | 0.10      | 10.81    | 0.000             |
| imp7          | 0.60       | 0.04      | 15.08    | 0.000             |
| imp8          | 0.33       | 0.02      | 14.09    | 0.000             |

*Note.* *Est* = Estimate, *SE* = Standard Error for *z*.
