# Supplementary material for: The climate change distress and impairment scale: Introduction of the measure and first findings on pro-environmental behavior
Source: Research Square preprint supplement (doi:10.21203/rs.3.rs-1986606/v1), 2022-08-26
Supplement: Supplementary file [file b762e3f0d518b505df29b463.pdf]

**Table S9**

*Study 1 EFA factor loading matrix for the five factor solution.*

|                | Factor 1 | Factor 2 | Factor 3 | Factor 4 | Factor 5 |
|----------------|----------|----------|----------|----------|----------|
| SS loadings    | 9.94     | 7.38     | 3.50     | 2.54     | 1.33     |
| Proportion Var | .17      | .13      | .06      | .04      | .02      |
| Cumulative Var | .17      | .30      | .37      | .41      | .43      |

*Note.* Test of the hypothesis that five factors are sufficient. The chi square statistic is 2016.7 on 1321 degrees of freedom,  $p = 5.7e-32$ . SS loadings = sum of squared loadings; Proportion Var = proportion variance explained; Cumulative Var = cumulative variance explained.

**Table S9***Study 1 EFA factor loading matrix for the five factor solution.*

| Items   | Factor 1 | Factor 2 | Factor 3 | Factor 4 | Factor 5 |
|---------|----------|----------|----------|----------|----------|
| ang1    | .44      |          |          |          |          |
| ang2    |          |          |          | .47      |          |
| ang3    | .48      |          |          | .41      |          |
| ang4    | .46      |          |          |          |          |
| ang5    | .40      |          |          |          |          |
| ang6    | .43      |          |          | .42      |          |
| ang7    |          |          |          | .49      |          |
| ang8    | .48      |          |          | .40      |          |
| ang9_r  | .57      |          |          | .35      |          |
| ang10_r | .66      |          |          |          |          |
| ang11_r | .47      |          |          | .40      |          |
| ang12_r | .59      |          |          |          |          |
| ang13_r | .58      |          |          |          |          |
| ang15_r | .64      |          |          |          |          |
| ang16_r | .57      |          |          |          |          |
| anx2    | .53      |          | .35      |          |          |
| anx3    |          |          | .51      |          |          |
| anx4    | .45      |          | .41      |          |          |
| anx5    |          |          | .36      |          |          |
| anx6    | .41      |          | .47      |          |          |
| anx7    | .49      |          | .47      |          |          |
| anx8    | .41      |          | .54      |          |          |
| anx9_r  | .43      |          |          |          |          |
| anx10_r | .71      |          |          |          |          |
| anx13_r | .72      |          |          |          |          |
| anx14_r | .62      |          |          |          |          |
| anx16_r | .62      |          |          |          |          |
| guilt5  |          |          |          |          |          |
| guilt6  | .53      |          |          |          |          |
| guilt7  |          |          | .41      |          |          |
| guilt8  |          | .36      |          |          |          |

*Note.* Table is continued on the next page for items assessing sadness and impairment.

**Table S9 Continued***Study 1 EFA factor loading matrix for the five factor solution.*

| Items   | Factor 1 | Factor 2 | Factor 3 | Factor 4 | Factor 5 |
|---------|----------|----------|----------|----------|----------|
| sad1    | .43      |          | .35      |          |          |
| sad2    |          | .57      |          |          | .61      |
| sad3    |          | .36      |          |          |          |
| sad4    |          | .39      | .37      |          | .36      |
| sad5    | .50      |          | .42      |          |          |
| sad6    | .57      |          | .39      |          |          |
| sad7    | .51      |          | .49      |          |          |
| sad8    |          | .50      |          |          |          |
| sad13_r | .64      |          |          |          |          |
| sad14_r | .41      |          |          |          |          |
| sad16_r | .74      |          |          |          |          |
| imp1    |          | .69      |          |          |          |
| imp2    |          | .61      |          |          |          |
| imp3    |          | .73      |          |          |          |
| imp6_r  |          | .53      |          |          |          |
| imp7_r  |          | .60      |          |          |          |
| imp8_r  |          | .59      |          |          |          |
| imp10_r |          | .65      |          |          |          |
| imps1   |          | .41      |          | .43      |          |
| imps3   |          | .60      |          |          |          |
| imps4_r |          | .45      |          |          |          |
| imps5_r |          | .46      |          |          |          |
| impw1   |          | .64      |          |          |          |
| impw2   |          | .77      |          |          |          |
| impw3_r |          | .67      |          |          |          |
| impw4_r |          | .66      |          |          |          |
