# Supplementary material for: The climate change distress and impairment scale: Introduction of the measure and first findings on pro-environmental behavior
Source: Research Square preprint supplement (doi:10.21203/rs.3.rs-1986606/v1), 2022-08-26
Supplement: Supplementary file [file dc21e5e36744bf913ec0cb4a.pdf]

**Table S10**

*Study 1 EFA factor loading matrix for the two factor solution.*

|                | Factor 1 | Factor 2 |
|----------------|----------|----------|
| SS loadings    | 13.05    | 8.24     |
| Proportion Var | .23      | .14      |
| Cumulative Var | .23      | .37      |

*Note.* Test of the hypothesis that two factors are sufficient. The chi square statistic is 2870.09 on 1483 degrees of freedom,  $p = 4.16e-91$ . Overall explained variance only 37%. Factor 1: negative climate affect (anger, anxiety, sadness, guilt). Factor 2: impairment (and cross-loadings from several sadness items that could denote depression like constructs). SS loadings = sum of squared loadings; Proportion Var = proportion variance explained; Cumulative Var = cumulative variance explained.

**Table S10***Study 1 EFA factor loading matrix for the two factor solution.*

| Items   | Factor 1 | Factor 2 |
|---------|----------|----------|
| ang1    | .52      |          |
| ang2    |          |          |
| ang3    | .63      |          |
| ang4    | .56      |          |
| ang5    | .56      |          |
| ang6    | .57      |          |
| ang7    | .37      |          |
| ang8    | .63      |          |
| ang9_r  | .60      |          |
| ang10_r | .60      |          |
| ang11_r | .50      |          |
| ang12_r | .52      |          |
| ang13_r | .52      |          |
| ang15_r | .67      |          |
| ang16_r | .63      |          |
| anx2    | .65      |          |
| anx3    |          |          |
| anx4    | .58      |          |
| anx5    | .46      |          |
| anx6    | .58      |          |
| anx7    | .69      |          |
| anx8    | .60      |          |
| anx9_r  | .45      |          |
| anx10_r | .72      |          |
| anx13_r | .71      |          |
| anx14_r | .71      |          |
| anx16_r | .63      |          |
| guilt5  |          |          |
| guilt6  | .53      |          |
| guilt7  | .37      |          |
| guilt8  |          | .36      |

*Note.* Table is continued on the next page for items assessing sadness and impairment.

**Table S10 Continued***Study 1 EFA factor loading matrix for the two factor solution.*

|         | Factor 1 | Factor 2 |
|---------|----------|----------|
| sad1    | .56      |          |
| sad2    |          | .70      |
| sad3    | .43      | .46      |
| sad4    | .41      | .51      |
| sad5    | .60      |          |
| sad6    | .67      |          |
| sad7    | .69      |          |
| sad8    | .38      | .57      |
| sad13_r | .68      |          |
| sad14_r | .40      |          |
| sad16_r | .70      |          |
| imp1    |          | .73      |
| imp2    |          | .69      |
| imp3    |          | .79      |
| imp6_r  |          | .46      |
| imp7_r  |          | .58      |
| imp8_r  |          | .53      |
| imp10_r |          | .63      |
| imp1    |          | .45      |
| imp3    |          | .62      |
| imp4_r  |          | .44      |
| imp5_r  |          | .43      |
| impw1   |          | .68      |
| impw2   |          | .79      |
| impw3_r |          | .65      |
| impw4_r |          | .60      |
