# Supplementary material for: The climate change distress and impairment scale: Introduction of the measure and first findings on pro-environmental behavior
Source: Research Square preprint supplement (doi:10.21203/rs.3.rs-1986606/v1), 2022-08-26
Supplement: Supplementary file [file e595e71de3141182595f38b9.pdf]

**Table S13**

*Study 2 EFA factor loading matrix for the two factor solution (full item set).*

|                | Factor 1 | Factor 2 |
|----------------|----------|----------|
| SS loadings    | 15.43    | 7.84     |
| Proportion Var | .23      | .12      |
| Cumulative Var | .23      | .35      |

*Note.* Test of the hypothesis that two factors are sufficient. The chi square statistic is 6858.62 on 2078 degrees of freedom,  $p = 0$ . SS loadings = sum of squared loadings; Proportion Var = proportion variance explained; Cumulative Var = cumulative variance explained.

**Table S13**

*Study 2 EFA factor loading matrix for the two factor solution (full item set).*

| Item    | Factor 1 | Factor 2 |
|---------|----------|----------|
| ang1    | .46      |          |
| ang2    | .51      |          |
| ang3    | .69      |          |
| ang4    | .47      |          |
| ang5    | .67      |          |
| ang6    | .51      |          |
| ang7    | .35      |          |
| ang8    | .74      |          |
| ang9_r  | .60      |          |
| ang10_r | .59      |          |
| ang11_r | .43      |          |
| ang12_r | .54      |          |
| ang13_r | .56      |          |
| ang15_r | .67      |          |
| ang16_r | .52      |          |
| anx2    | .71      |          |
| anx3    |          |          |
| anx4    | .62      |          |
| anx5    | .50      |          |
| anx6    | .68      |          |
| anx7    | .69      |          |
| anx8    | .57      |          |
| anx9_r  | .55      |          |
| anx10_r | .65      |          |
| anx13_r | .67      |          |
| anx14_r | .75      |          |
| anx16_r | .61      |          |

*Note.* Table is continued on the next page for items assessing sadness and guilt.

**Table S13 Continued***Study 2 EFA factor loading matrix for the two factor solution (full item set).*

| Item      | Factor 1 | Factor 2 |
|-----------|----------|----------|
| sad1      | .65      |          |
| sad2      | .51      | .50      |
| sad3      | .59      |          |
| sad4      | .56      |          |
| sad5      | .67      |          |
| sad6      | .67      |          |
| sad7      | .68      |          |
| sad8      | .65      | .37      |
| sad13_r   | .45      |          |
| sad14_r   | .43      |          |
| sad16_r   | .74      |          |
| guilt5    | .35      |          |
| guilt6    | .36      |          |
| guilt7    |          |          |
| guilt17_r |          |          |
| guilt18_r |          |          |
| guilt19   | .37      |          |
| guilt20_r | .46      |          |
| guilt21_r | .45      |          |
| guilt22   |          |          |
| guilt23_r | .41      |          |
| guilt24   |          |          |
| guilt25_r | .48      |          |
| guilt26_r | .36      |          |
| guilt27   | .40      |          |

*Note.* Table is continued on the next page for items assessing impairment.

**Table S13 Continued***Study 2 EFA factor loading matrix for the two factor solution (full item set).*

| Item     | Factor 1 | Factor 2 |
|----------|----------|----------|
| impg1    |          | .77      |
| impg2    |          | .73      |
| impg3    |          | .81      |
| impg6_r  |          | .65      |
| impg7_r  |          | .64      |
| impg8_r  |          | .55      |
| impg10_r |          | .65      |
| imps1    |          | .56      |
| imps3    |          | .62      |
| imps4_r  |          | .38      |
| imps5_r  |          | .42      |
| impw1    |          | .75      |
| impw2    |          | .71      |
| impw3_r  |          | .53      |
| impw4_r  |          | .60      |
